# Supplementary material
Source: Royal Society of Chemistry journal article supplement (doi:10.1039/d6ob00545d)

## Supporting Information

### Total synthesis of (+)-cassiol

Badrodin Ayyub Shaikh,\* Shoba R. Tejesvani

#### Contents

| <b>S.No</b> |                         | <b>Page No.</b> |
|-------------|-------------------------|-----------------|
| <b>1.</b>   | NMR spectra             | S2-S30          |
| <b>2.</b>   | HPLC data for <b>S3</b> | S31-S32         |

16-AUG-2025.151.fid  
SRT 1.8

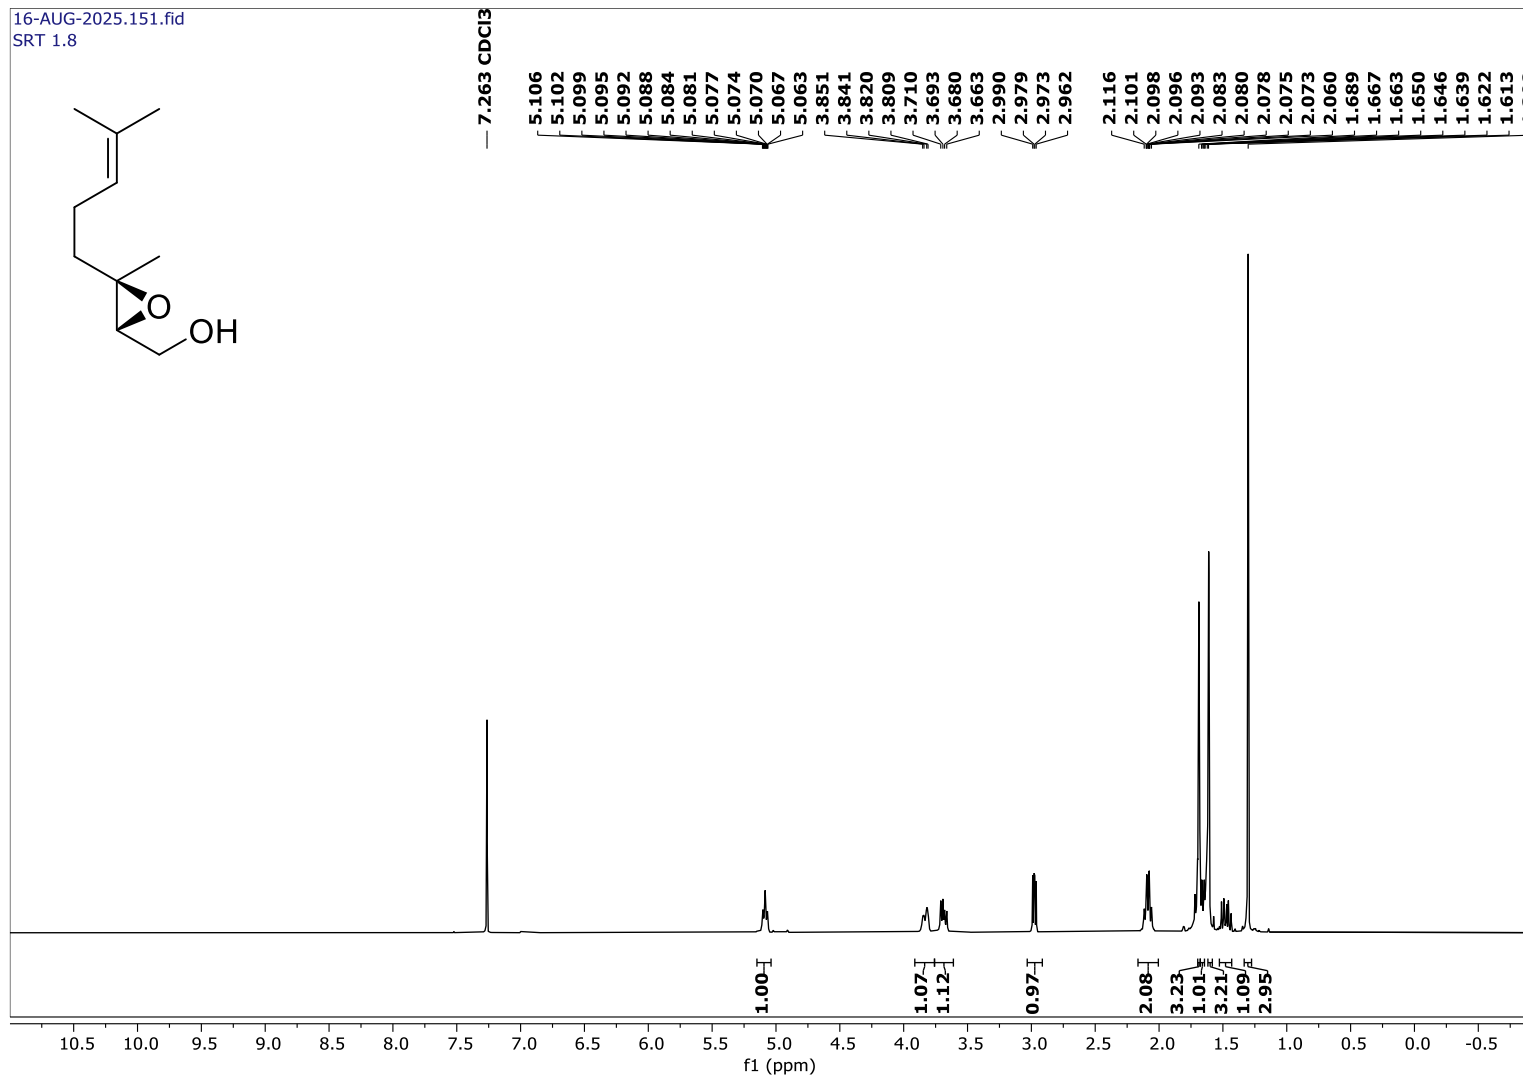

<sup>1</sup>H NMR spectrum (400 MHz, CDCl<sub>3</sub>) of **8**

11-AUG-2025.1036.fid  
SRT 1.5

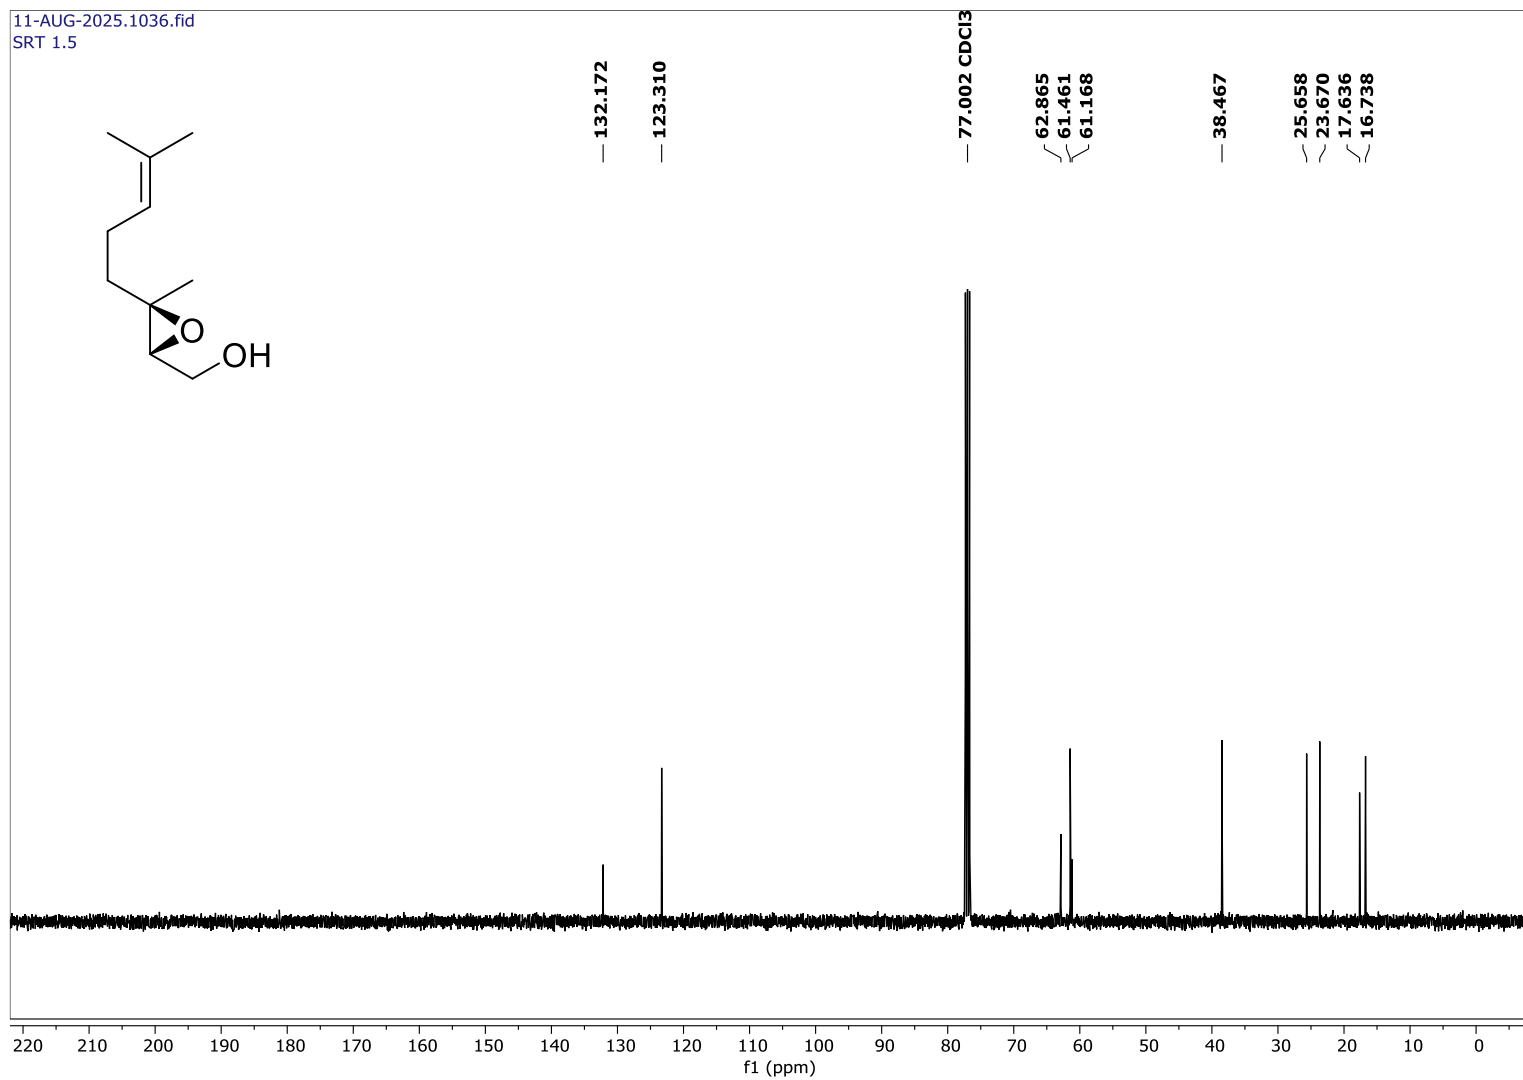

<sup>13</sup>C NMR spectrum (100 MHz, CDCl<sub>3</sub>) of **8**

13-AUG-2025.137.fid  
SRT 1.6

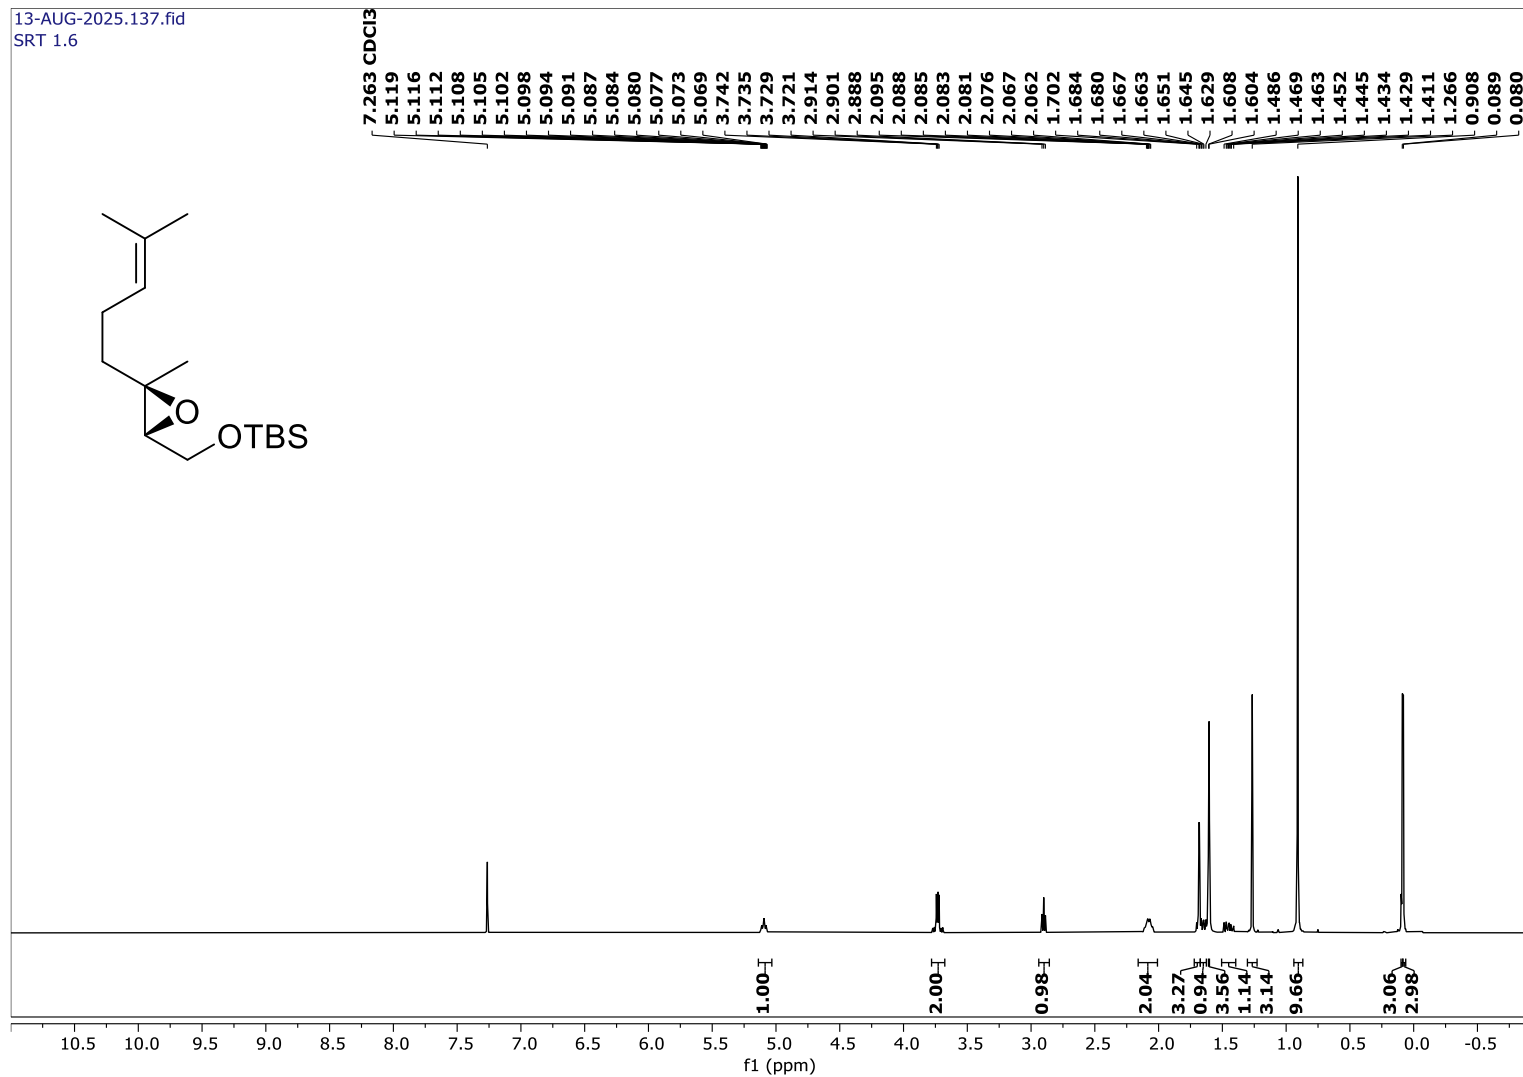

<sup>1</sup>H NMR spectrum (400 MHz, CDCl<sub>3</sub>) of 9

12-SEP-2025.1020.fid  
SRT 1.18

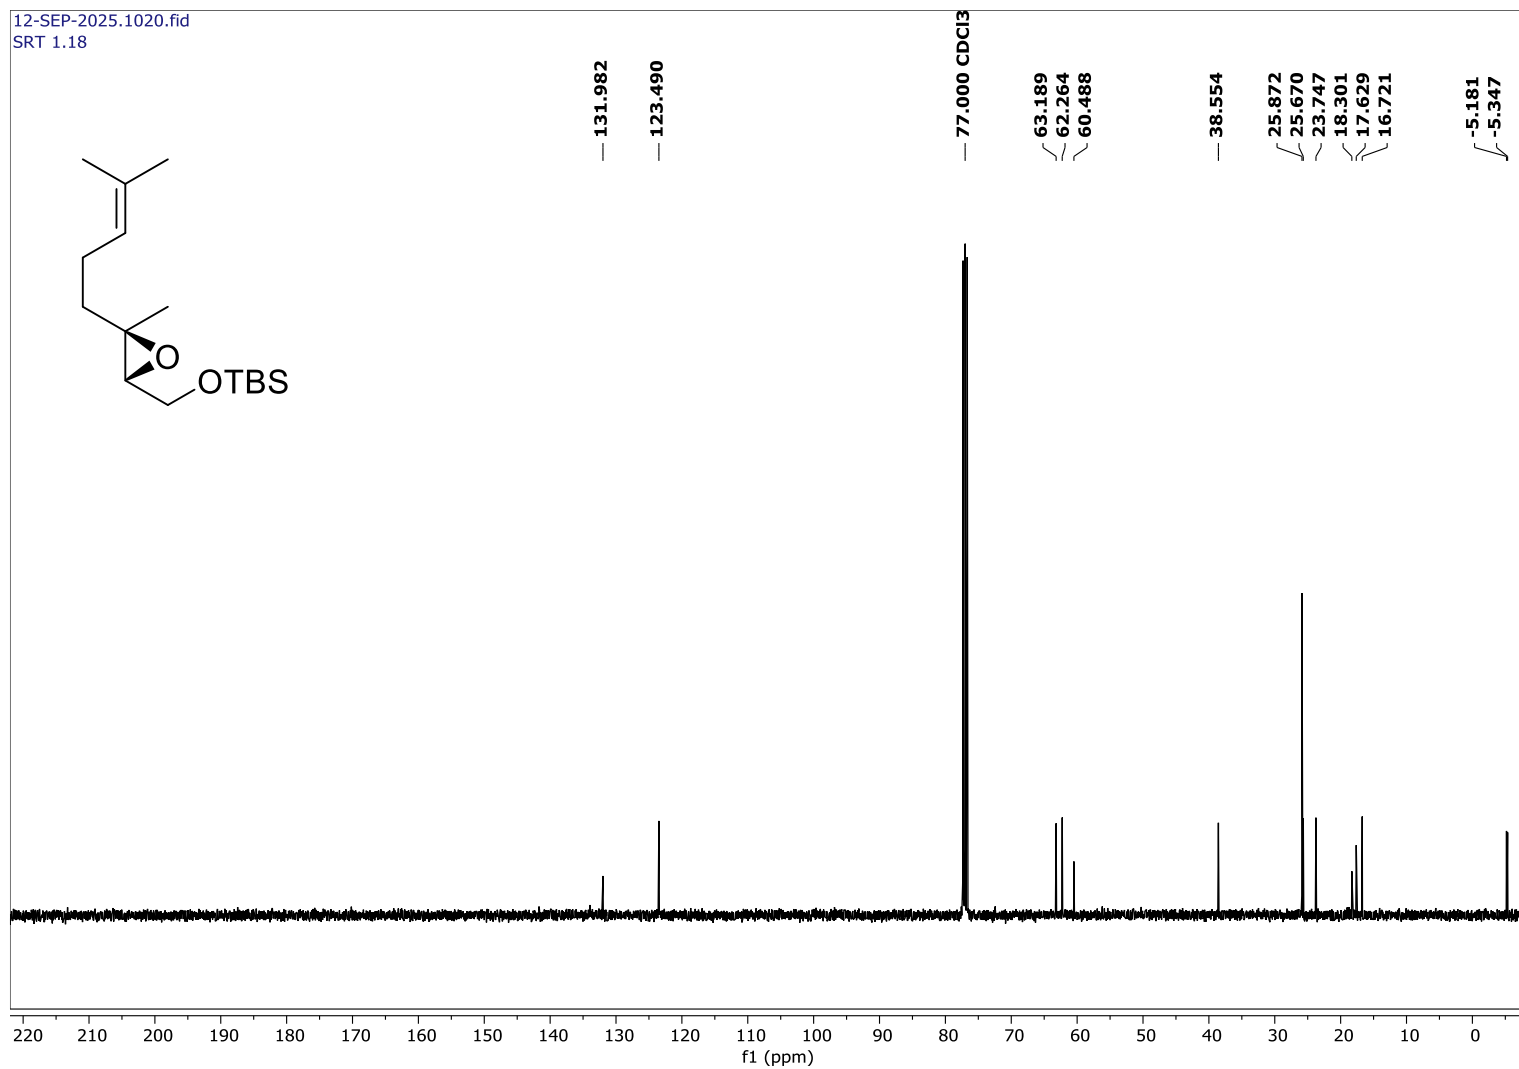

<sup>13</sup>C NMR spectrum (100 MHz, CDCl<sub>3</sub>) of **9**

13-SEP-2025.156.fid  
SRT.1.20

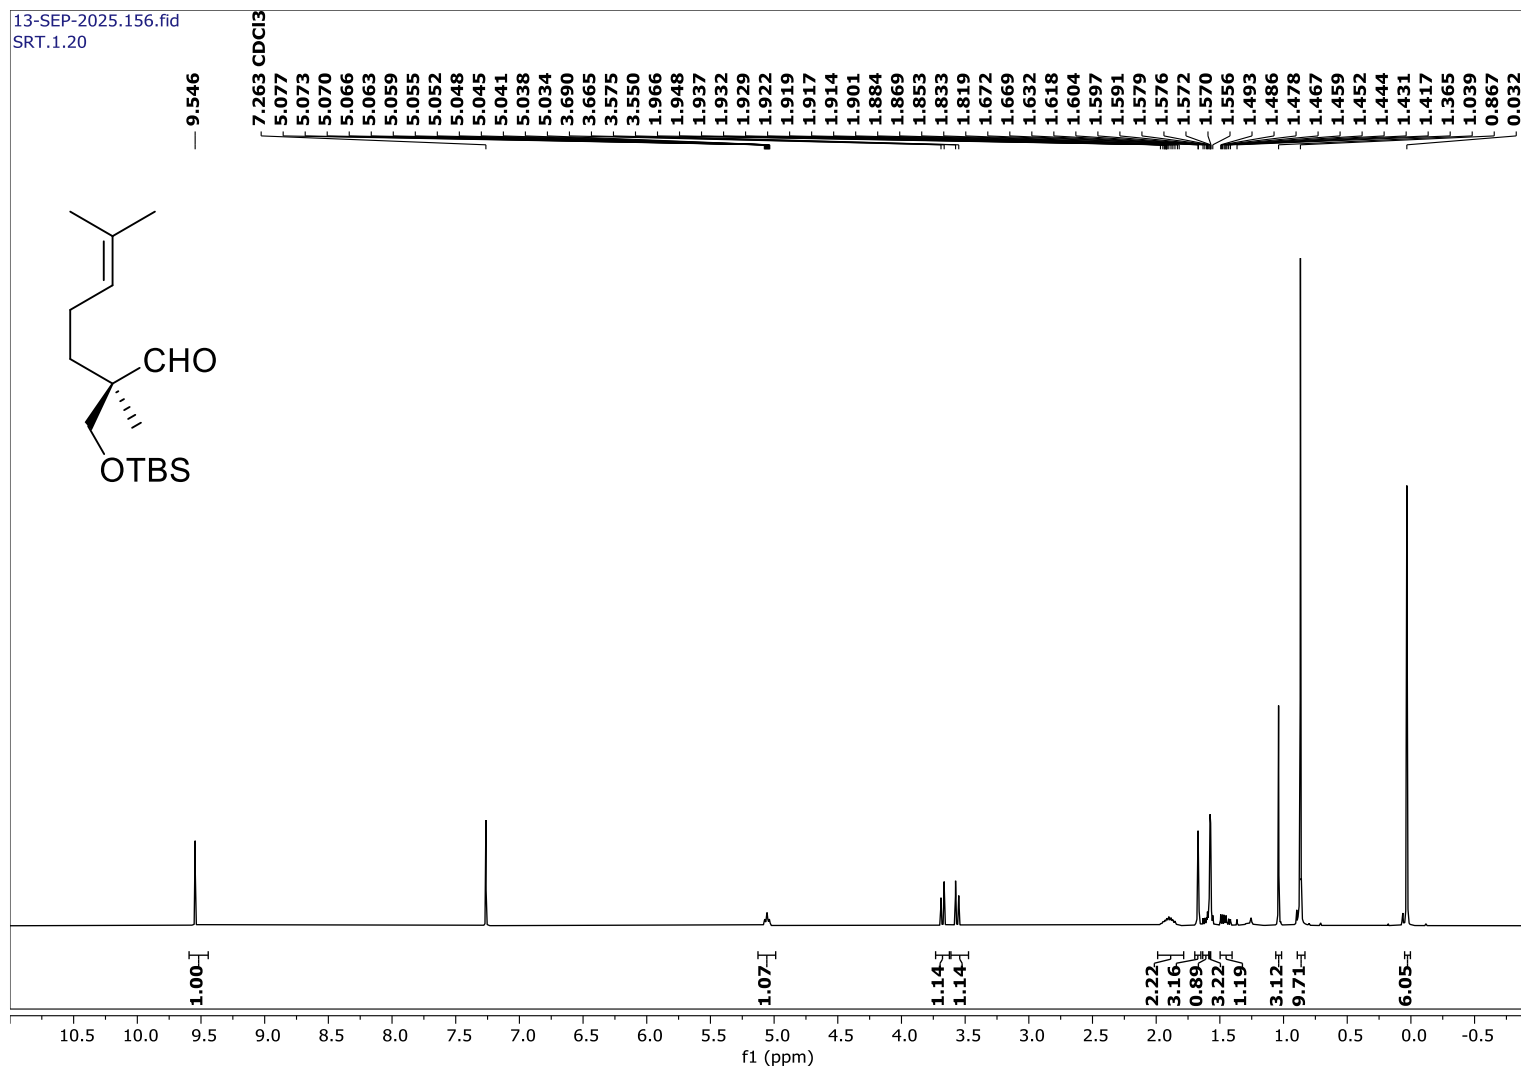

<sup>1</sup>H NMR spectrum (400 MHz, CDCl<sub>3</sub>) of **10**

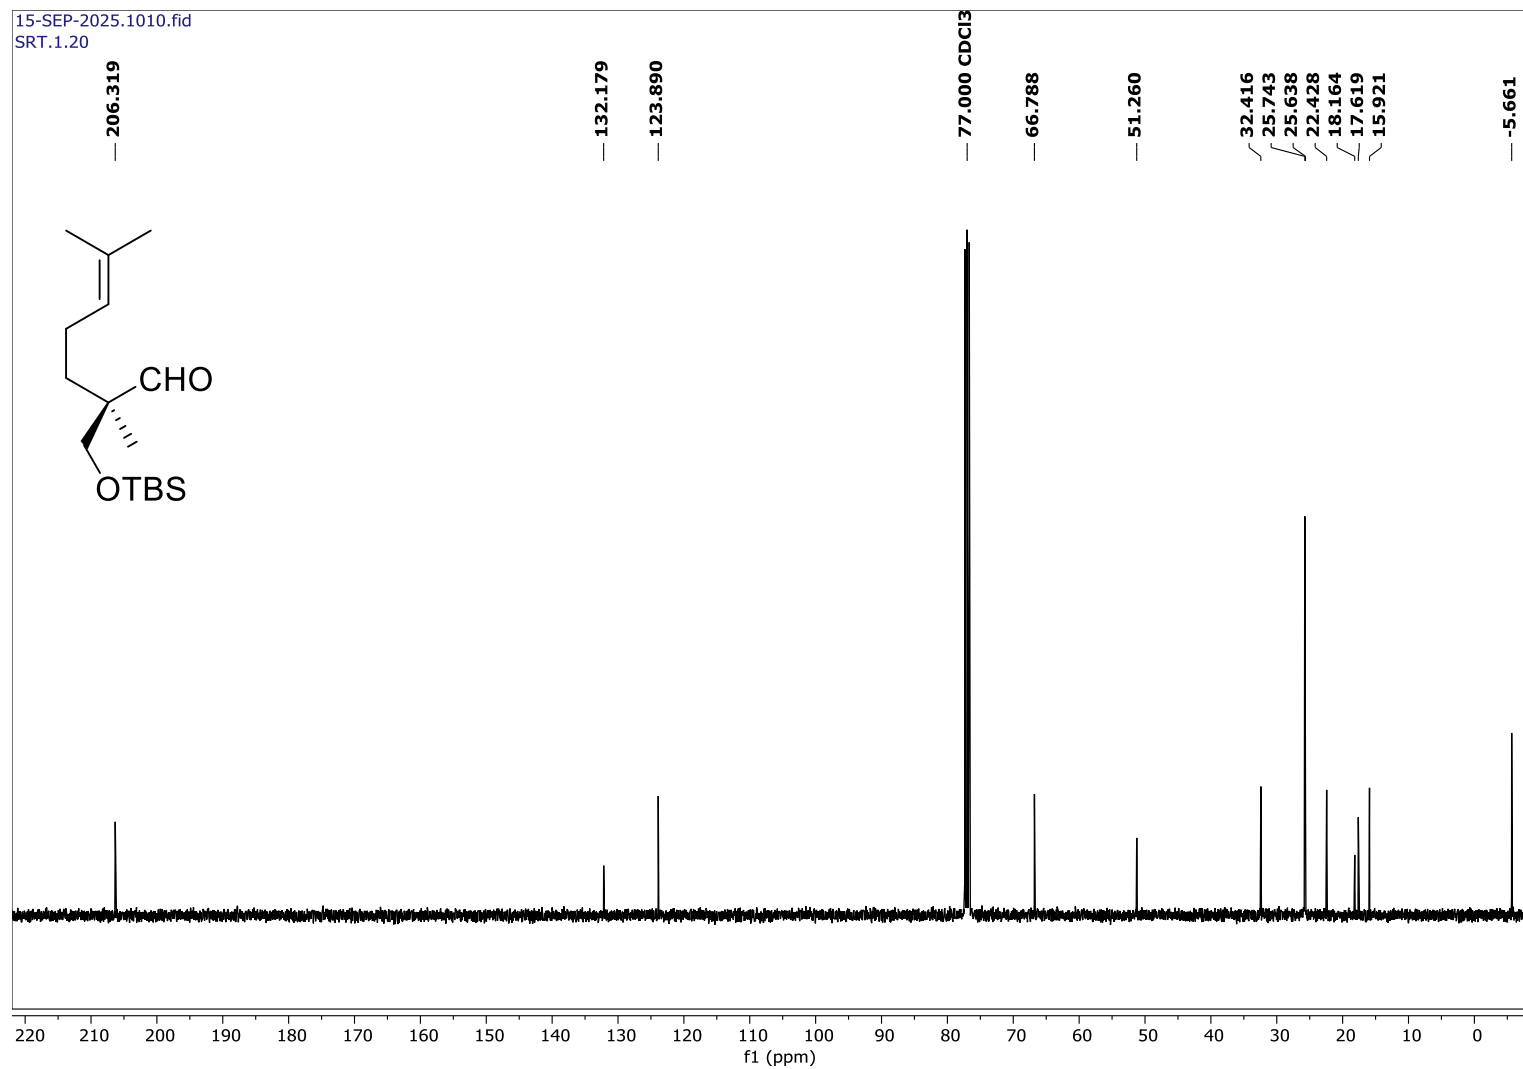

<sup>13</sup>C NMR spectrum (100 MHz, CDCl<sub>3</sub>) of **10**

16-SEP-2025.1028.fid  
SRT1.21

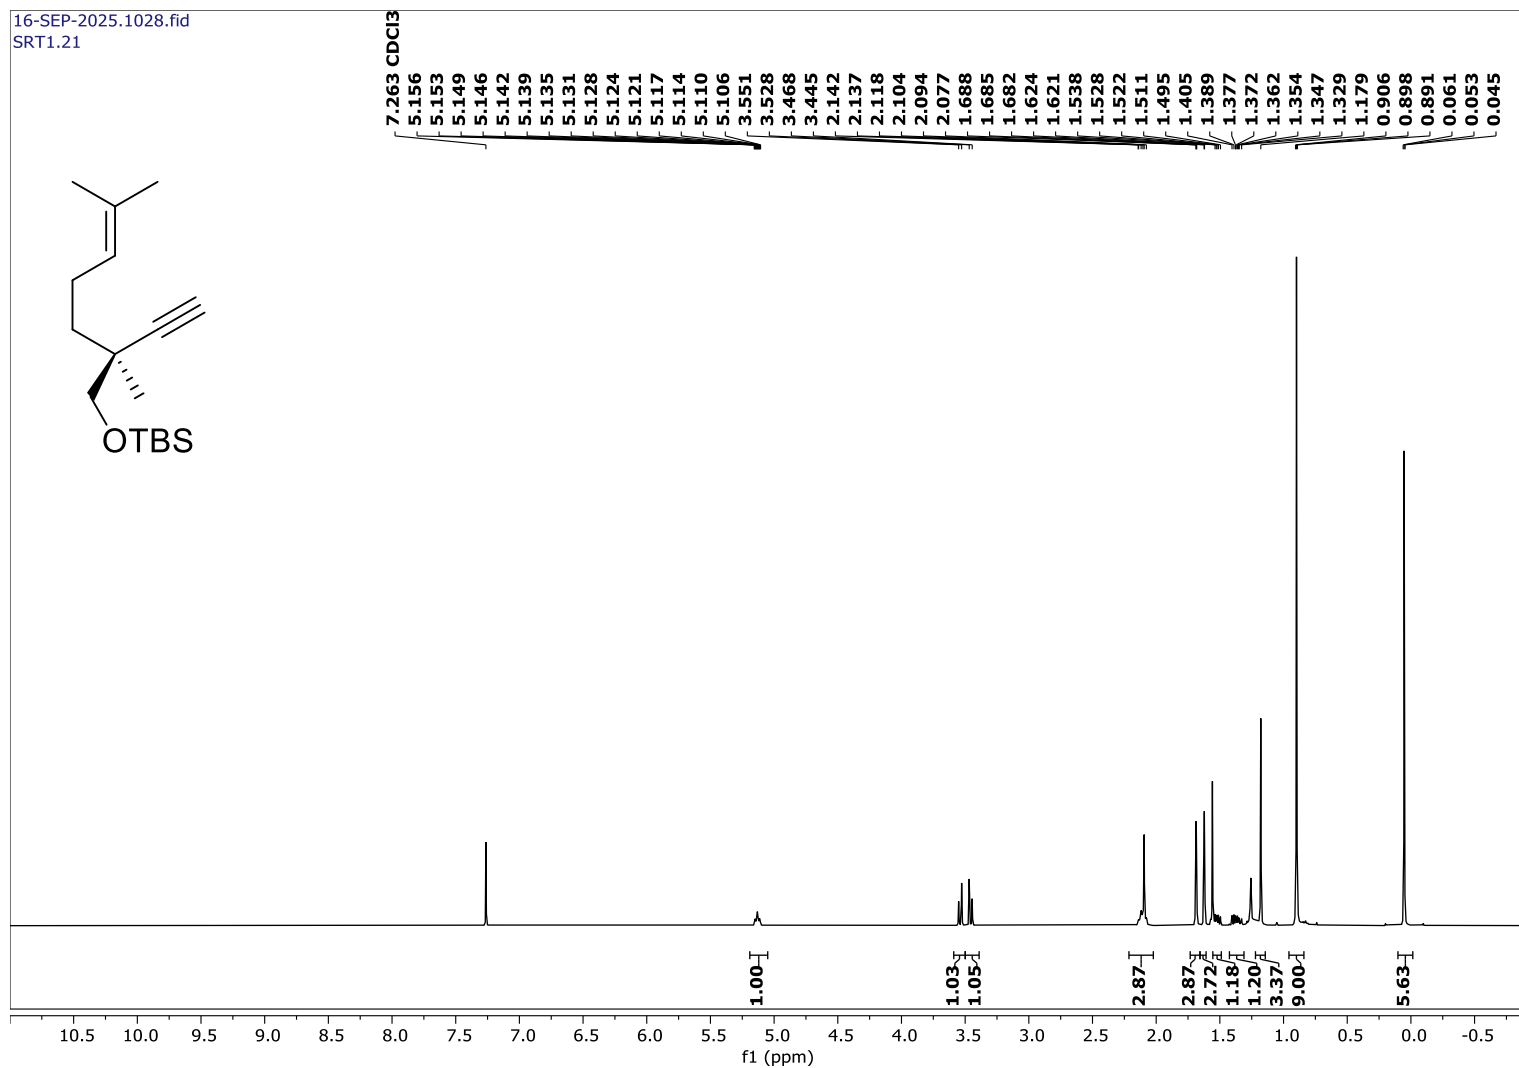

<sup>1</sup>H NMR spectrum (400 MHz, CDCl<sub>3</sub>) of 11

16-SEP-2025.1027.fid  
SRT1.21

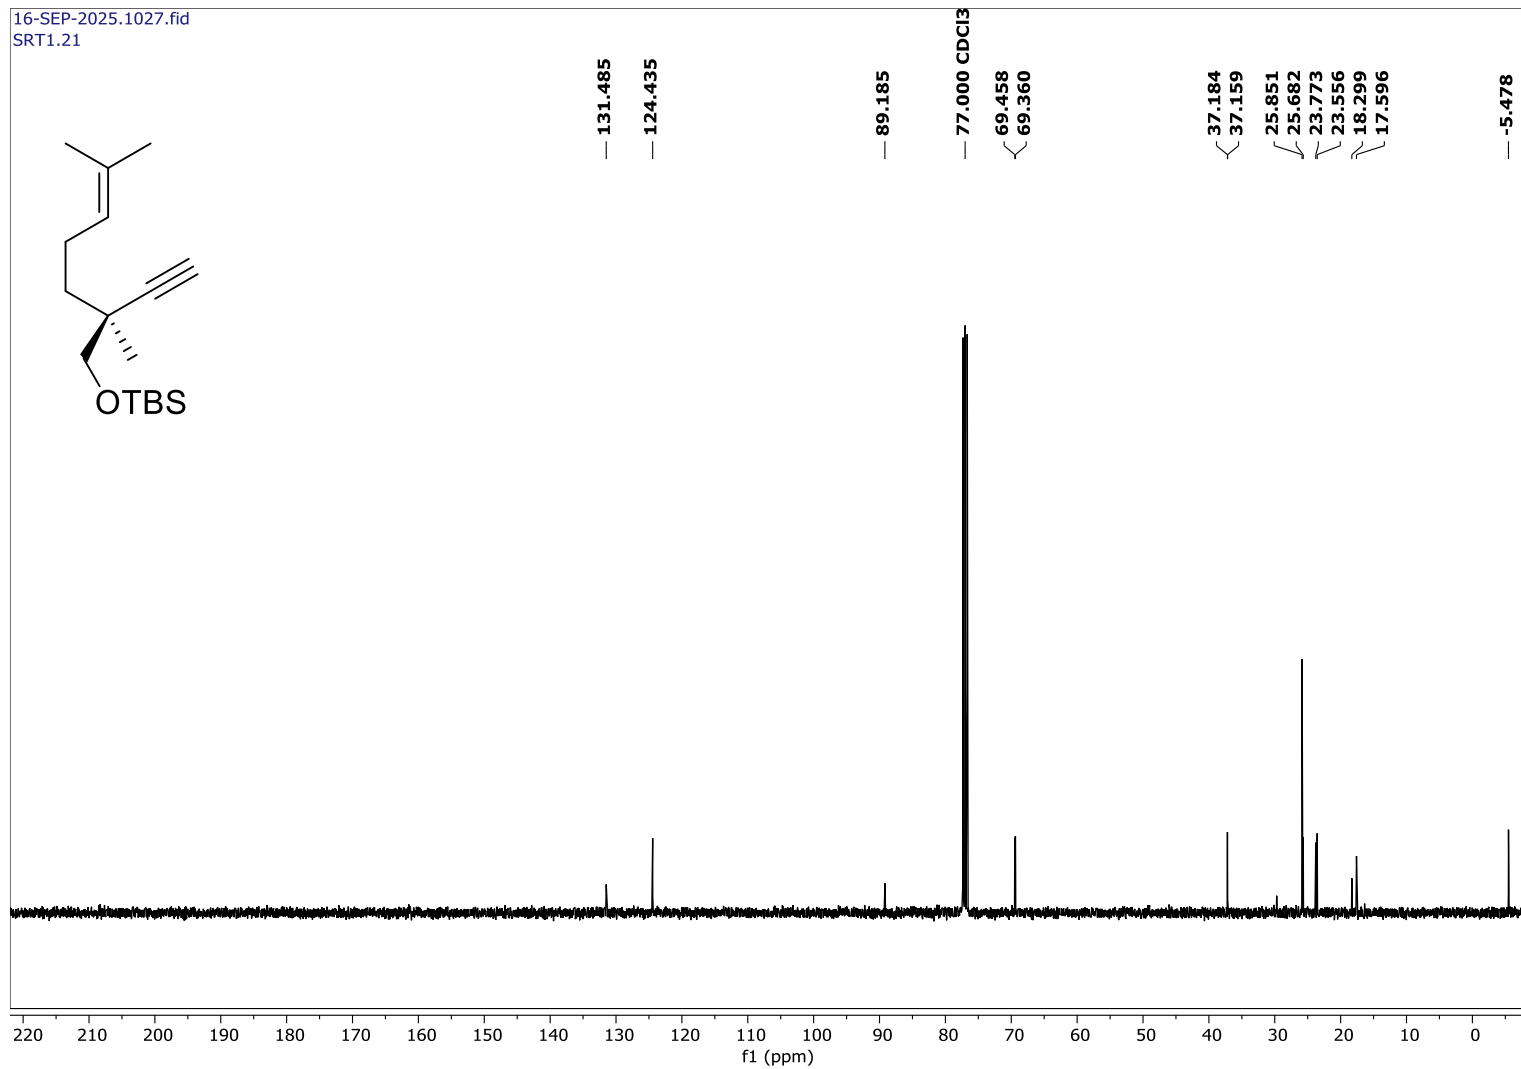

$^{13}\text{C}$  NMR spectrum (100 MHz,  $\text{CDCl}_3$ ) of 11

11-FEB-2026.1038.fid  
SRT-1.113

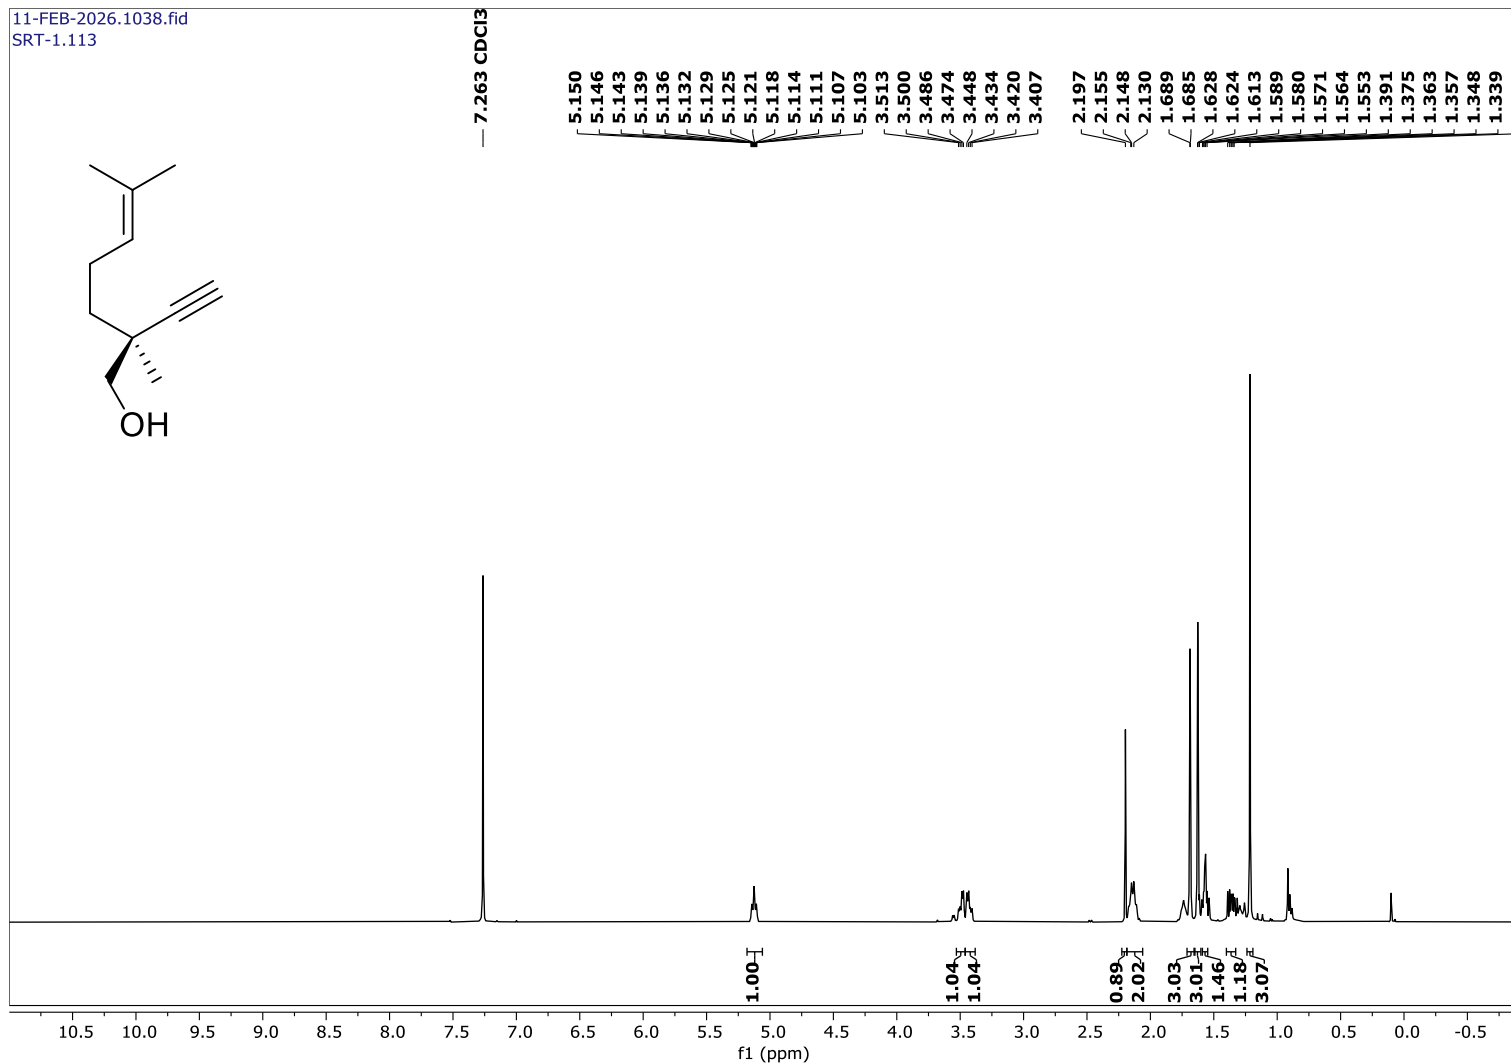

<sup>1</sup>H NMR spectrum (400 MHz, CDCl<sub>3</sub>) of S1

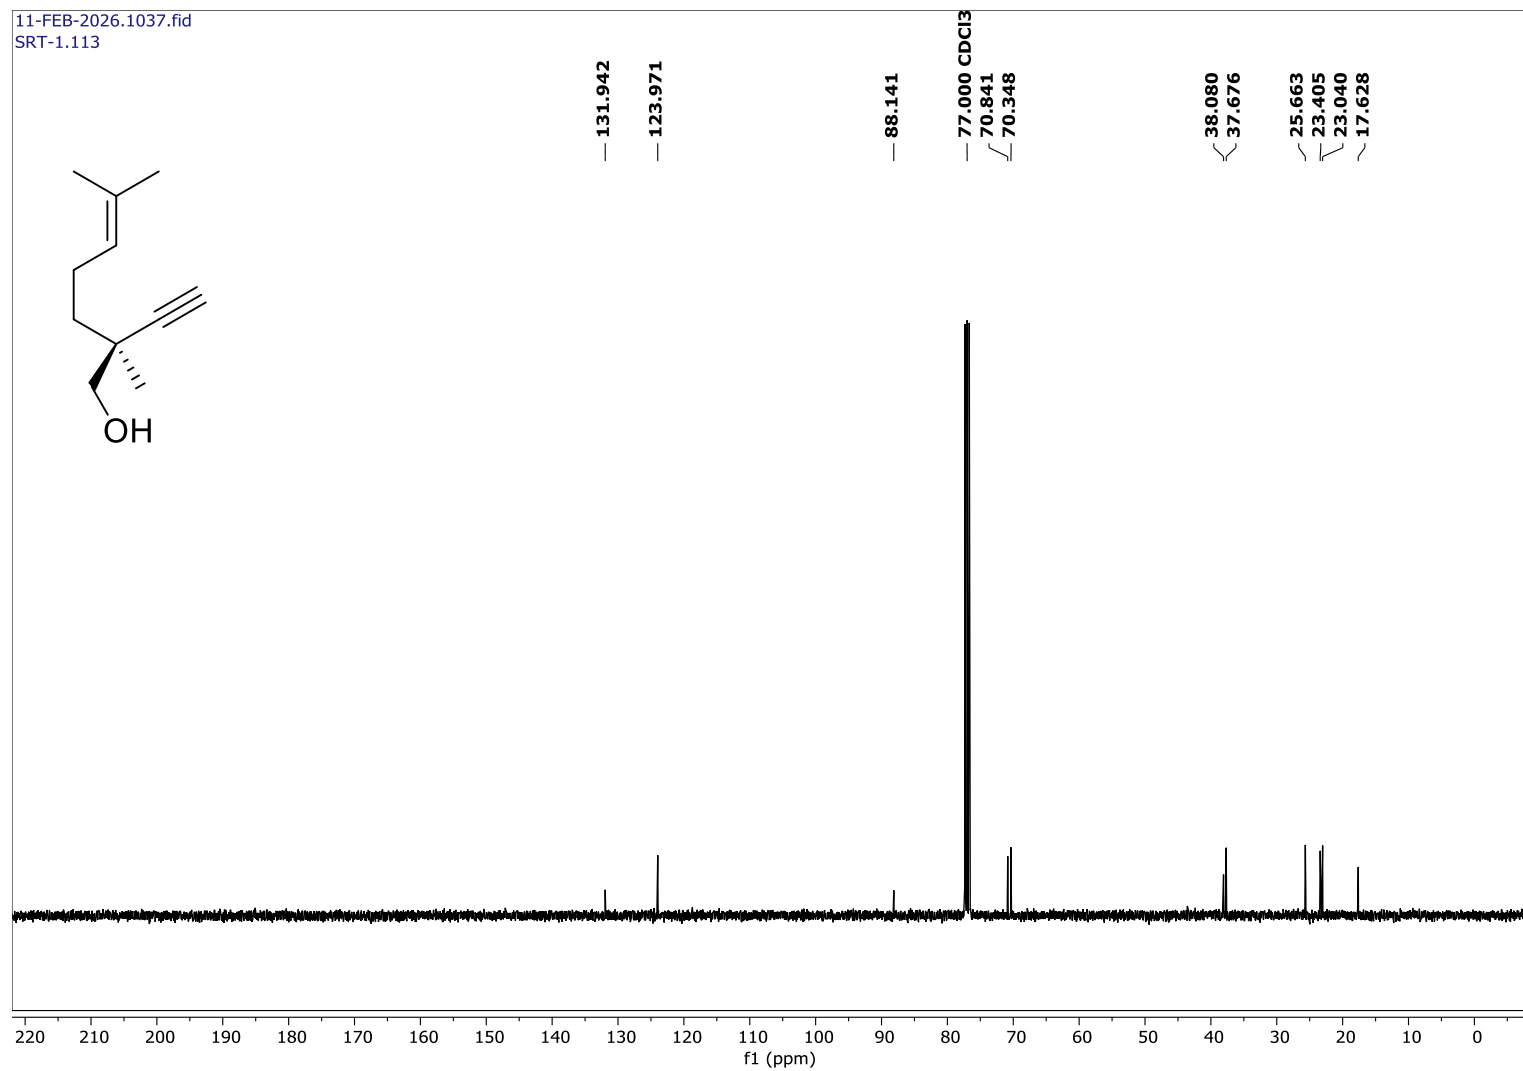

<sup>13</sup>C NMR spectrum (100 MHz, CDCl<sub>3</sub>) of **S1**

12-FEB-2026.1025.fid  
SRT-1.115

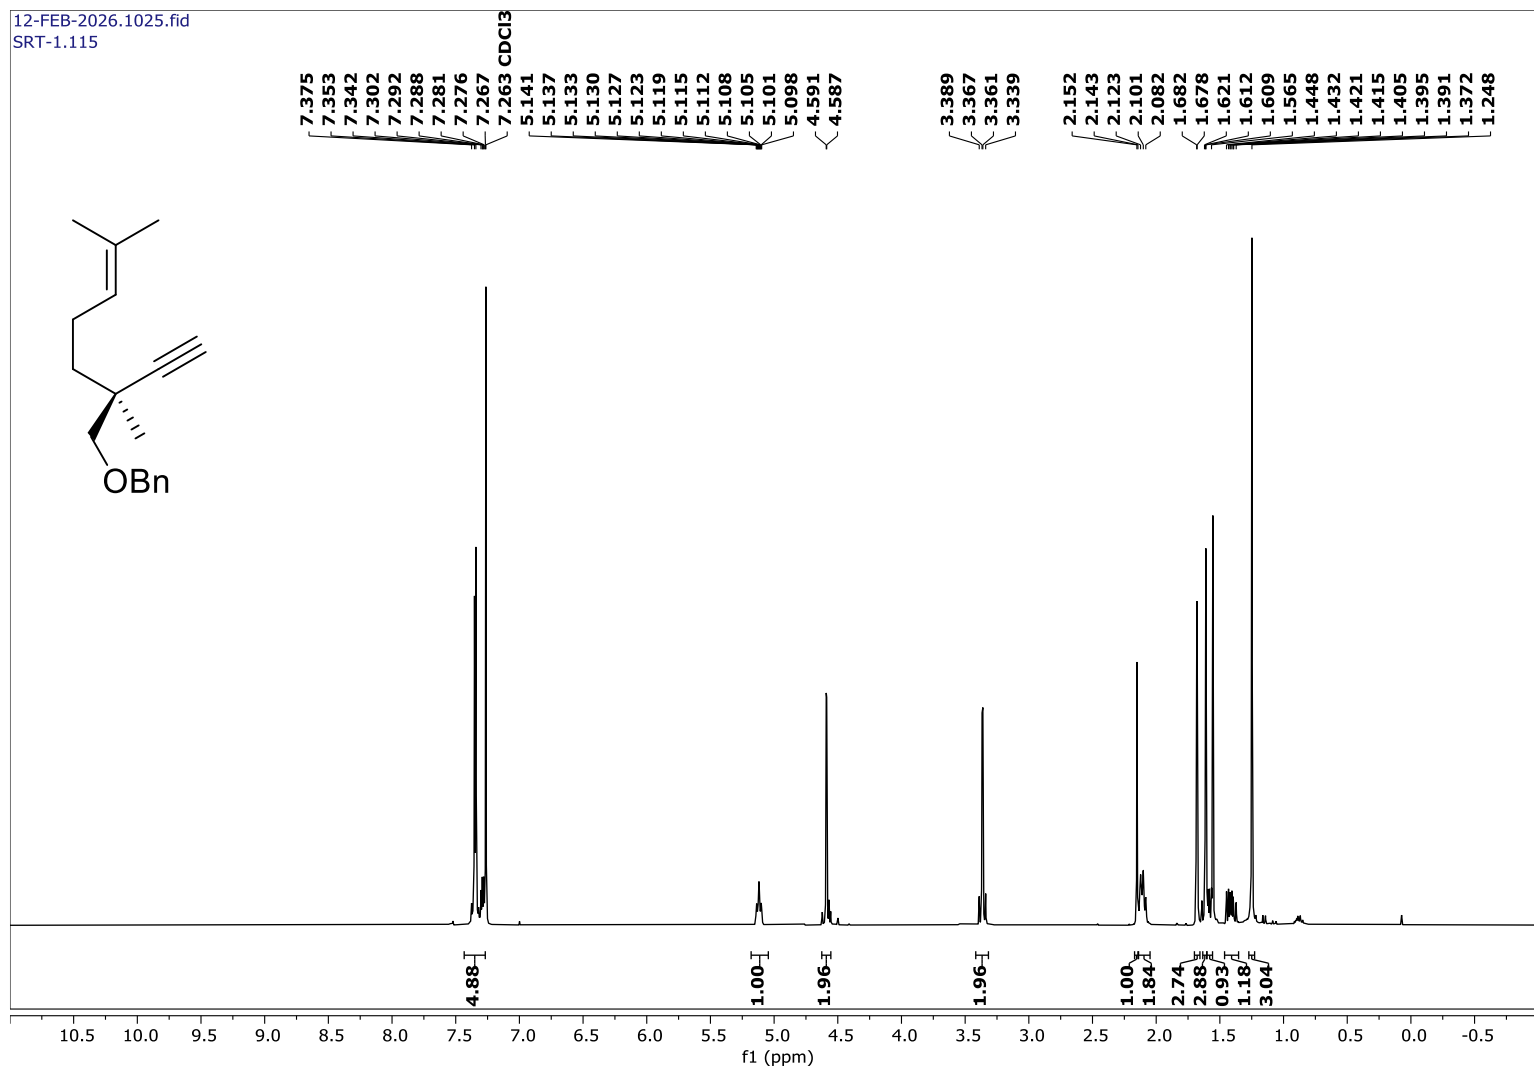

<sup>1</sup>H NMR spectrum (400 MHz, CDCl<sub>3</sub>) of **12**

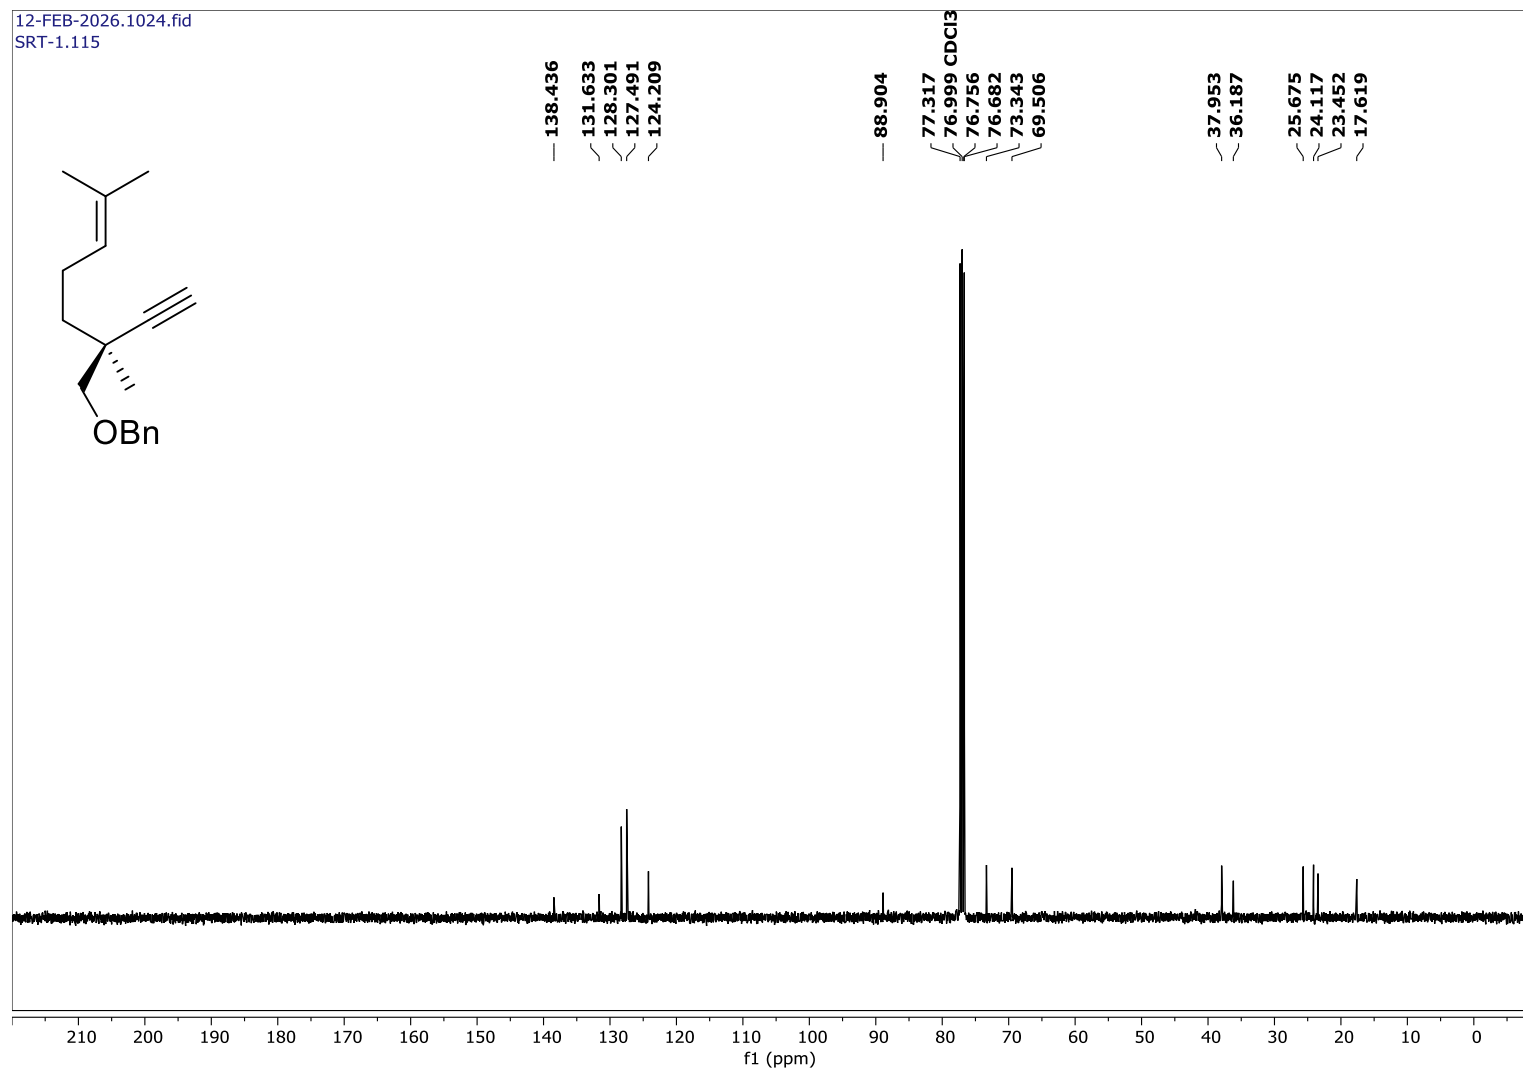

<sup>13</sup>C NMR spectrum (100 MHz, CDCl<sub>3</sub>) of **12**

19-FEB-2026.1008.fid  
SRT 1.51 R-V

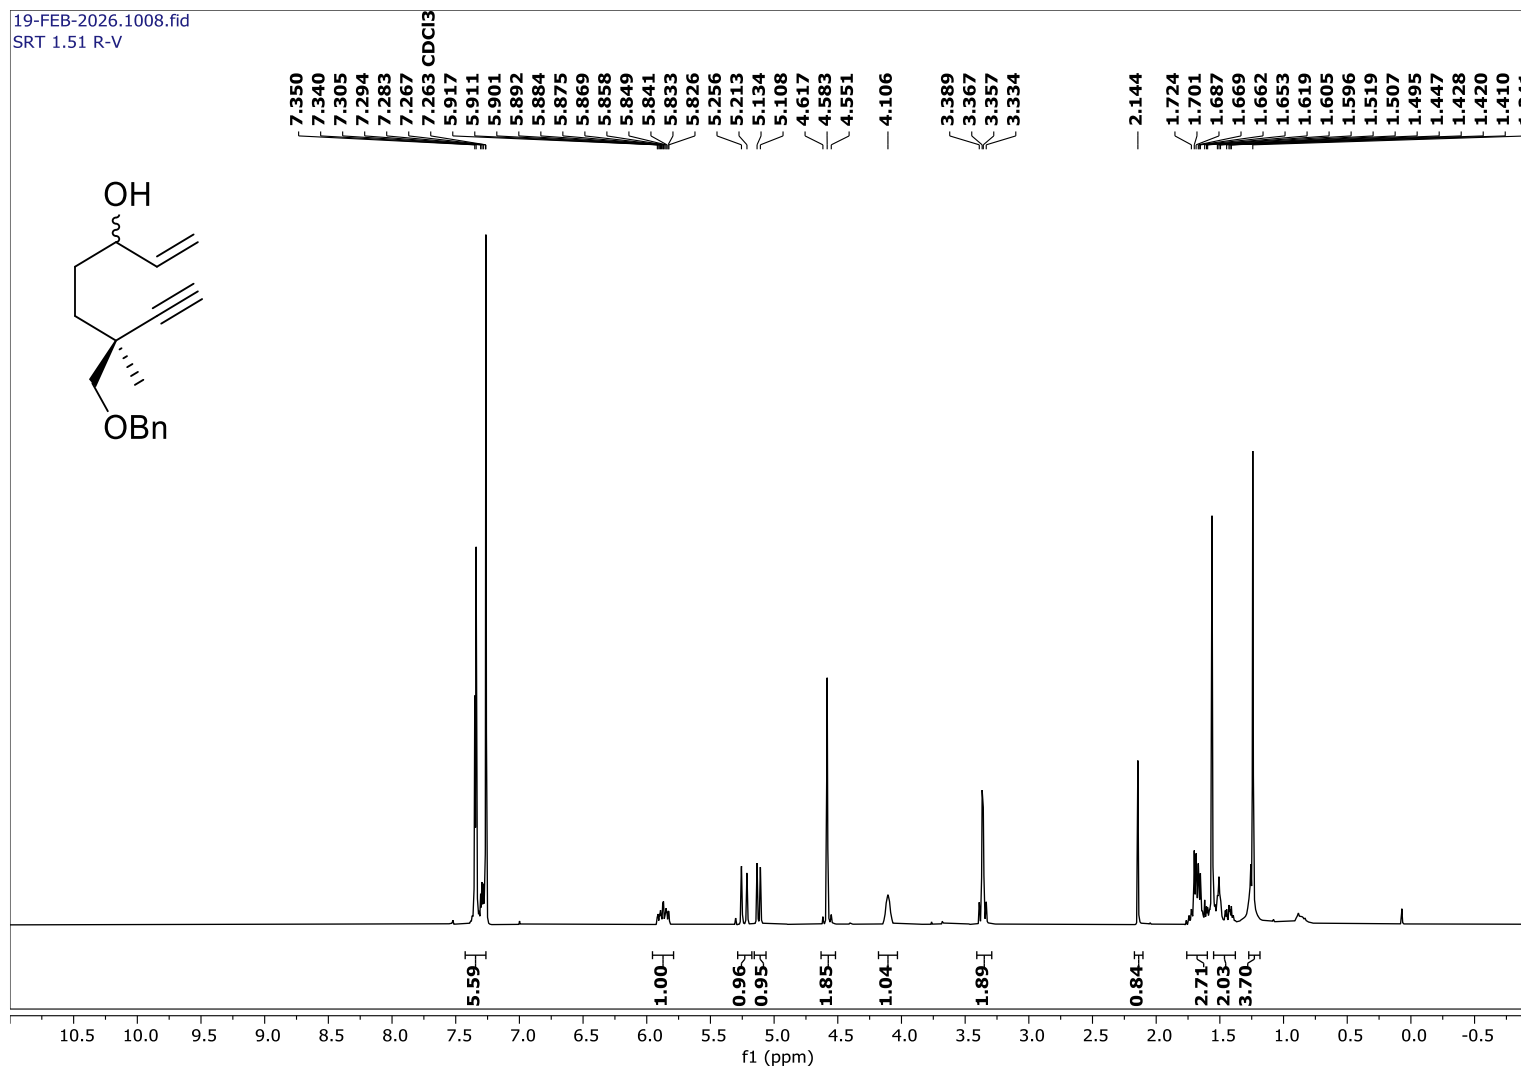

<sup>1</sup>H NMR spectrum (400 MHz, CDCl<sub>3</sub>) of 14

04-NOV-2025.1034.fid  
SRT 1.51

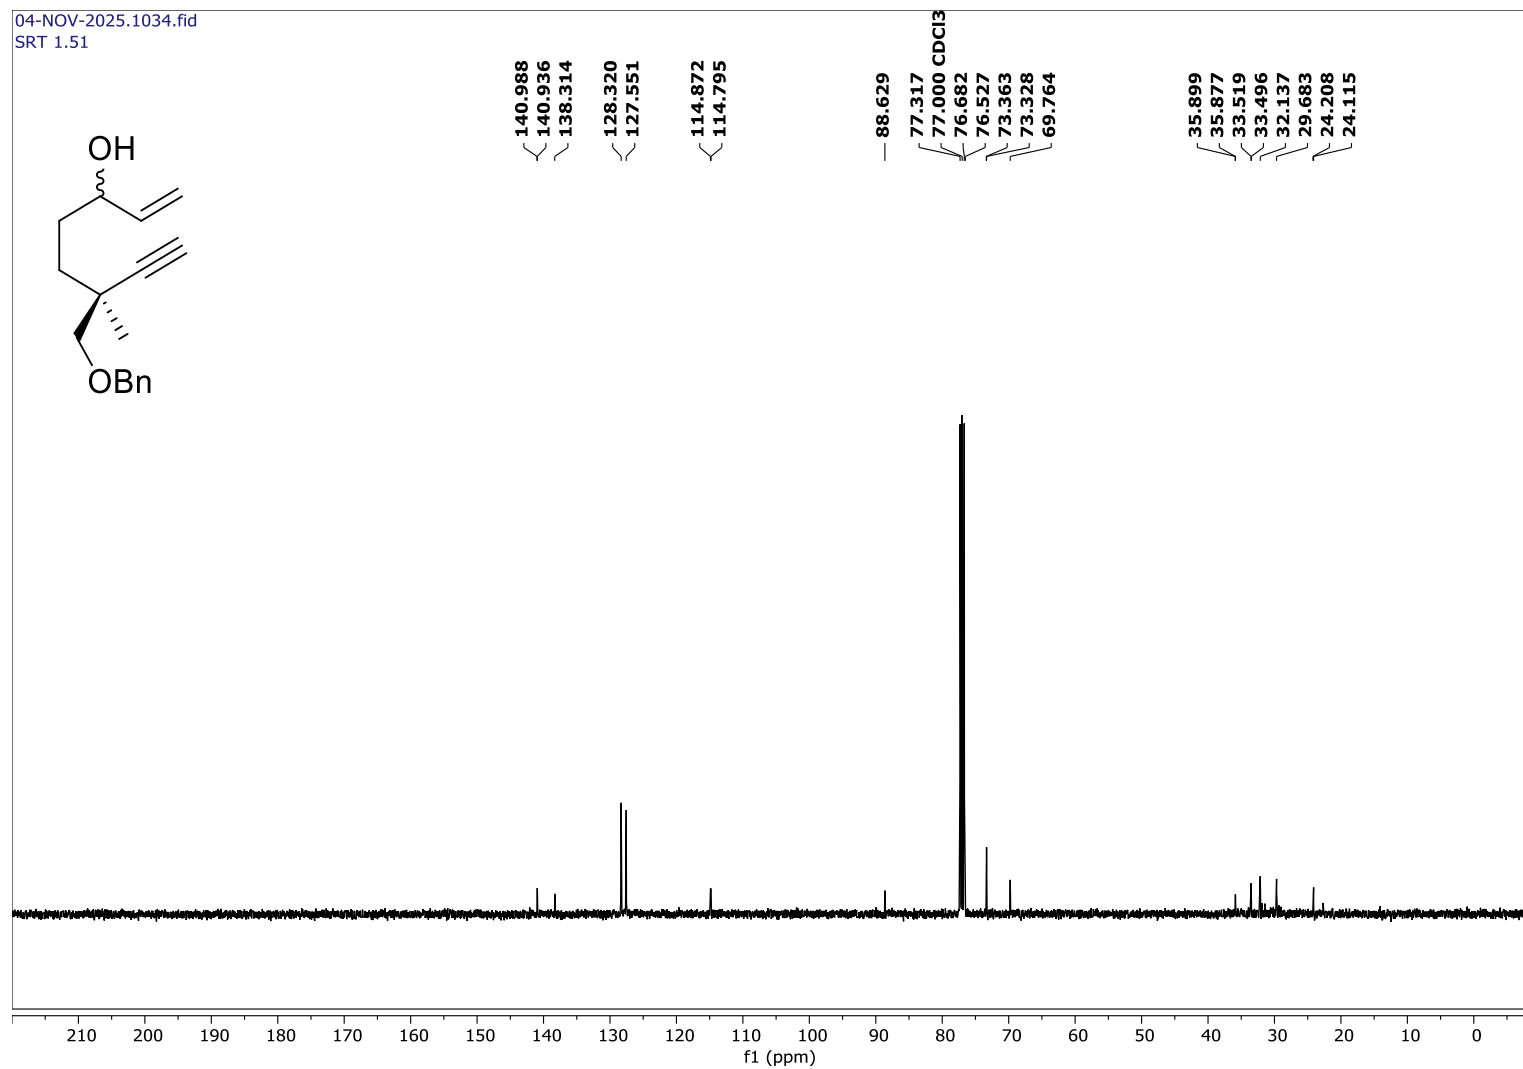

<sup>13</sup>C NMR spectrum (100 MHz, CDCl<sub>3</sub>) of **14**

19-FEB-2026.1005.fid  
SRT 1.45 R-P

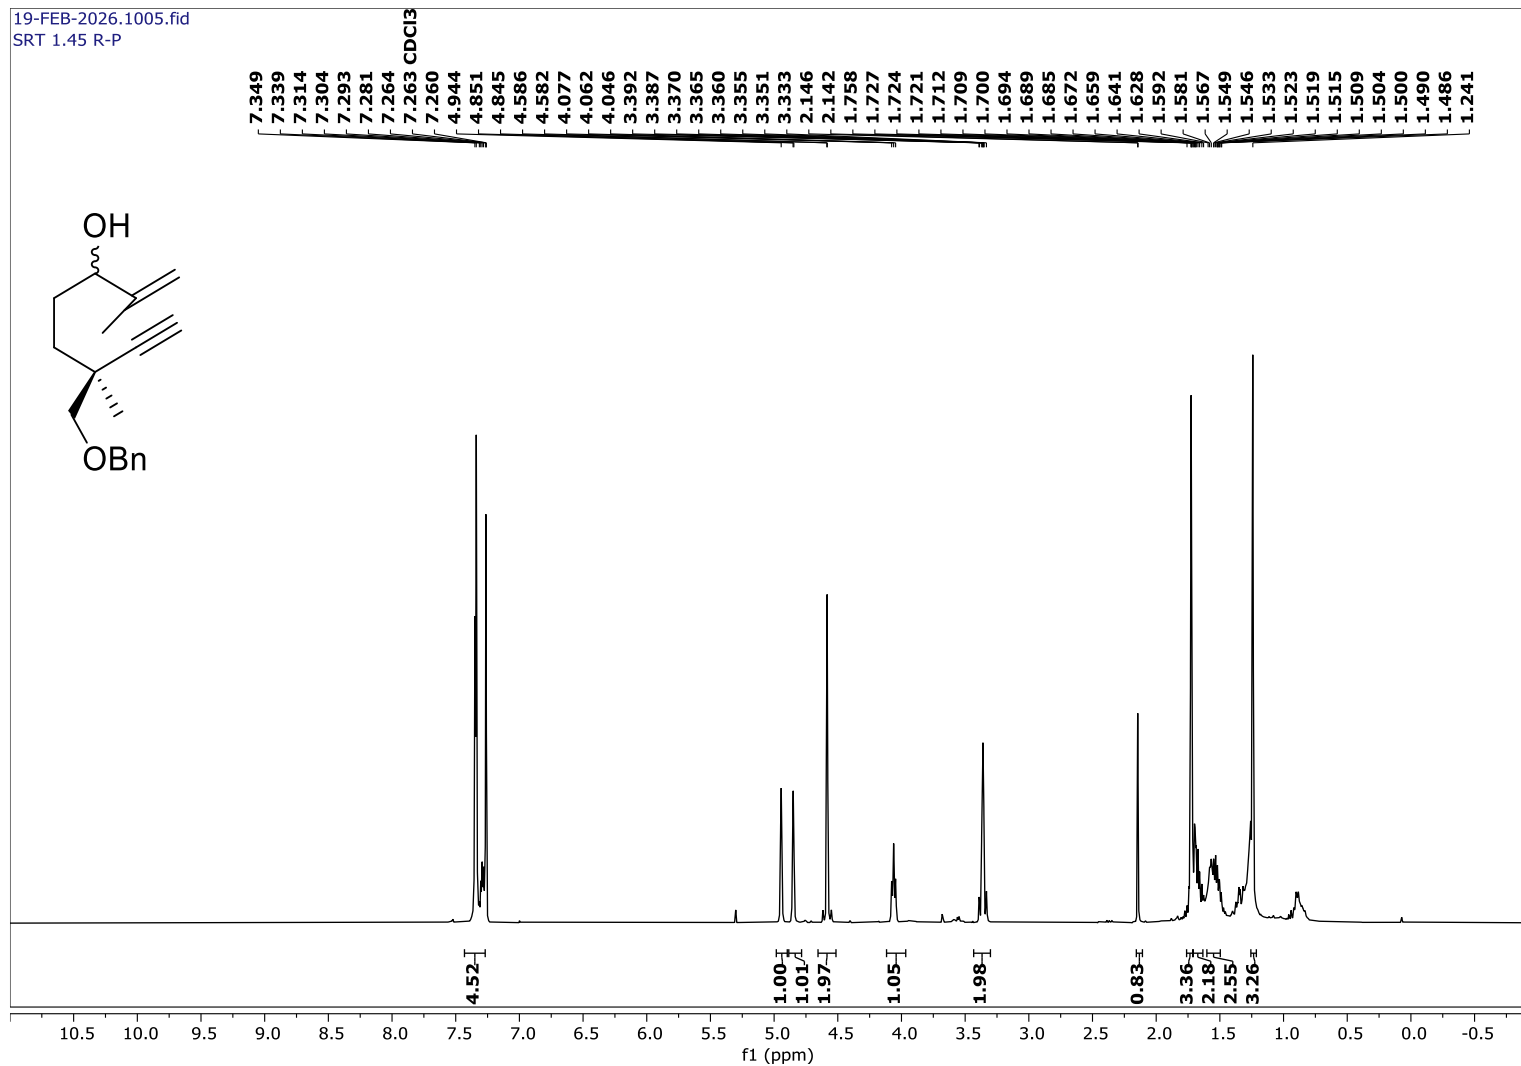

<sup>1</sup>H NMR spectrum (400 MHz, CDCl<sub>3</sub>) of 13

19-FEB-2026.1006.fid  
SRT 1.45 R-P

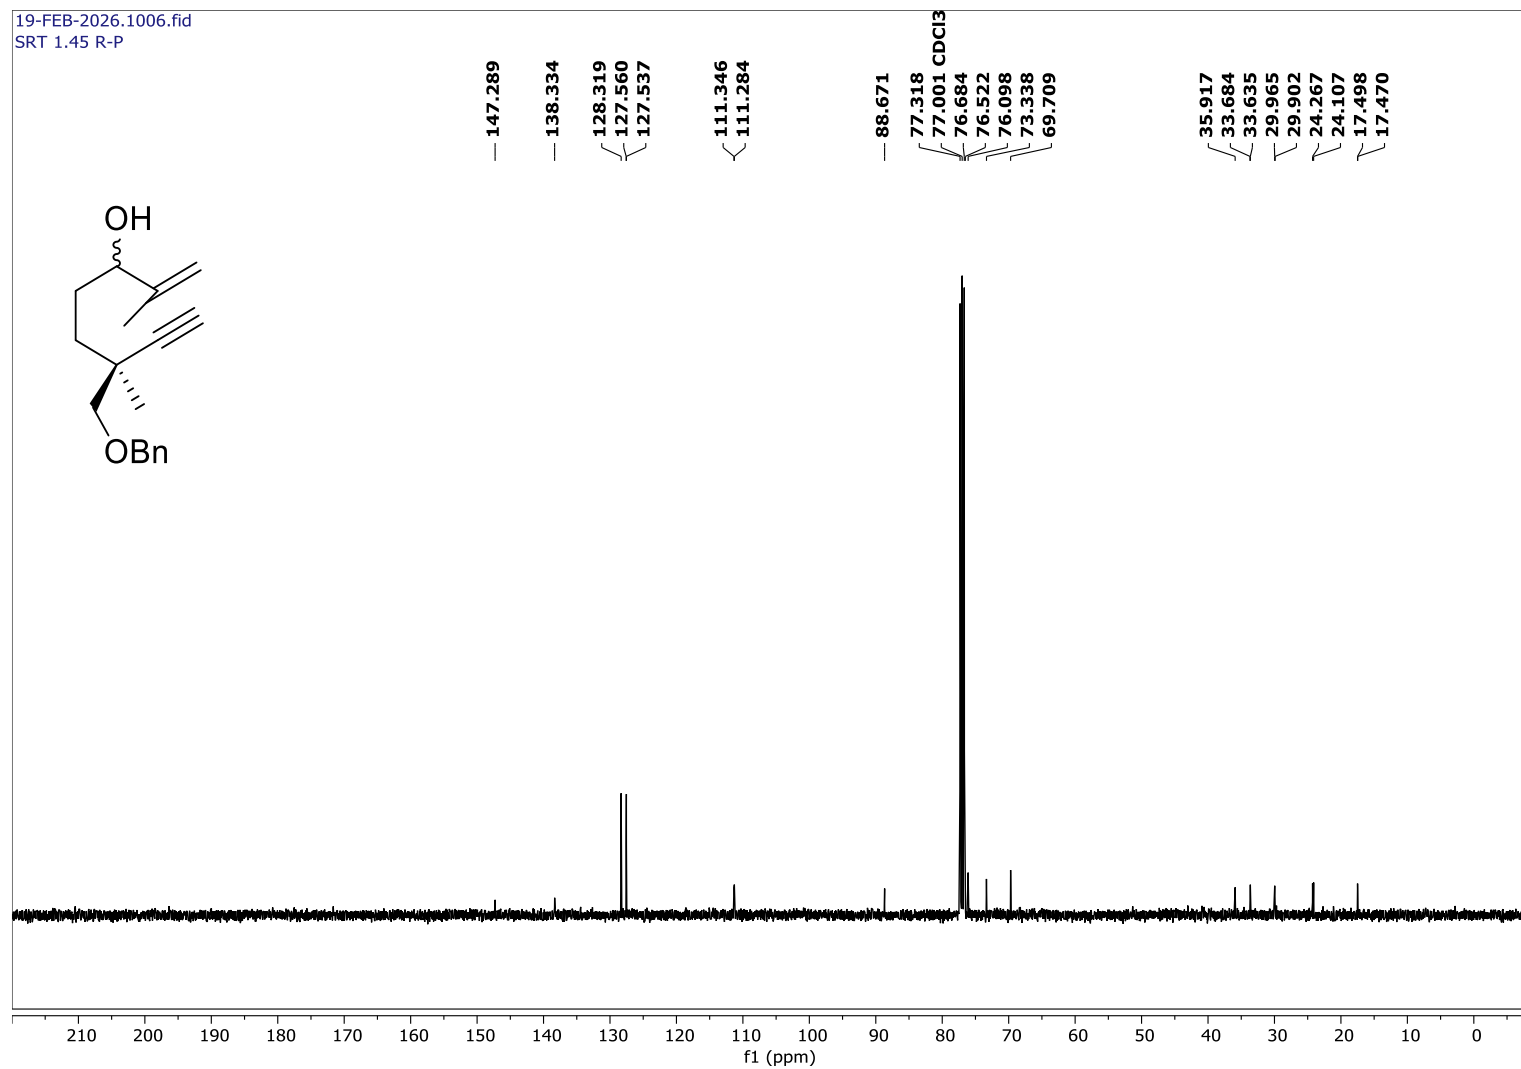

<sup>13</sup>C NMR spectrum (100 MHz, CDCl<sub>3</sub>) of **13**

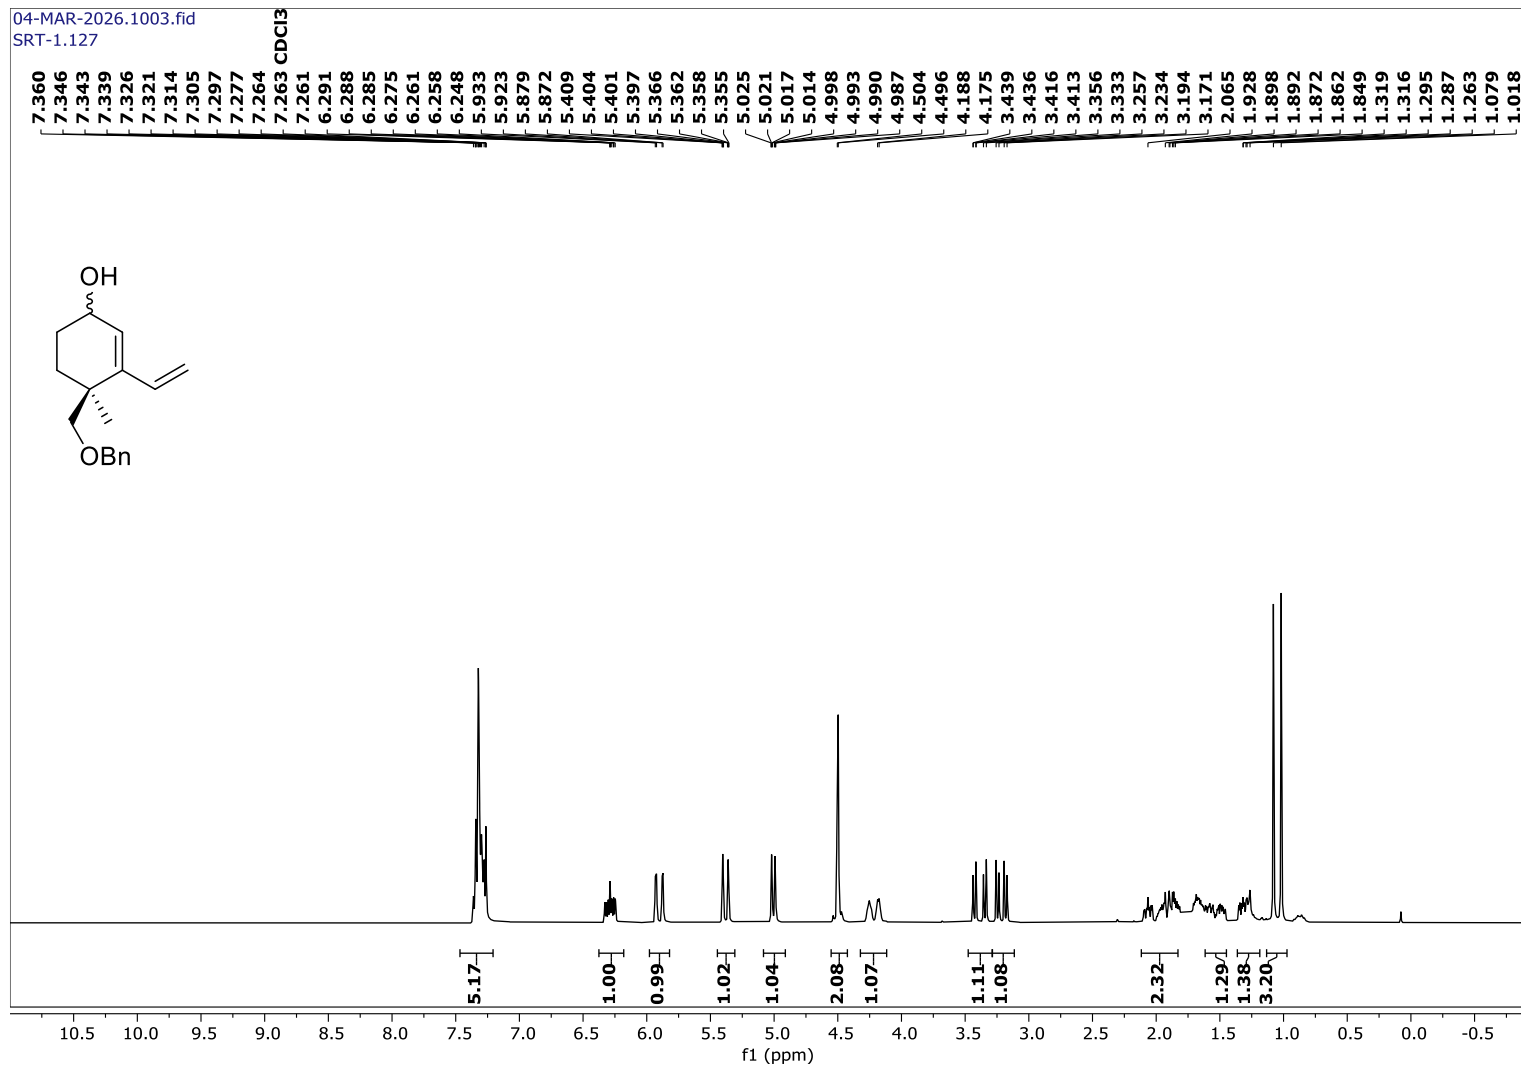

<sup>1</sup>H NMR spectrum (400 MHz, CDCl<sub>3</sub>) of **15**

04-MAR-2026.1004.fid  
SRT-1.127

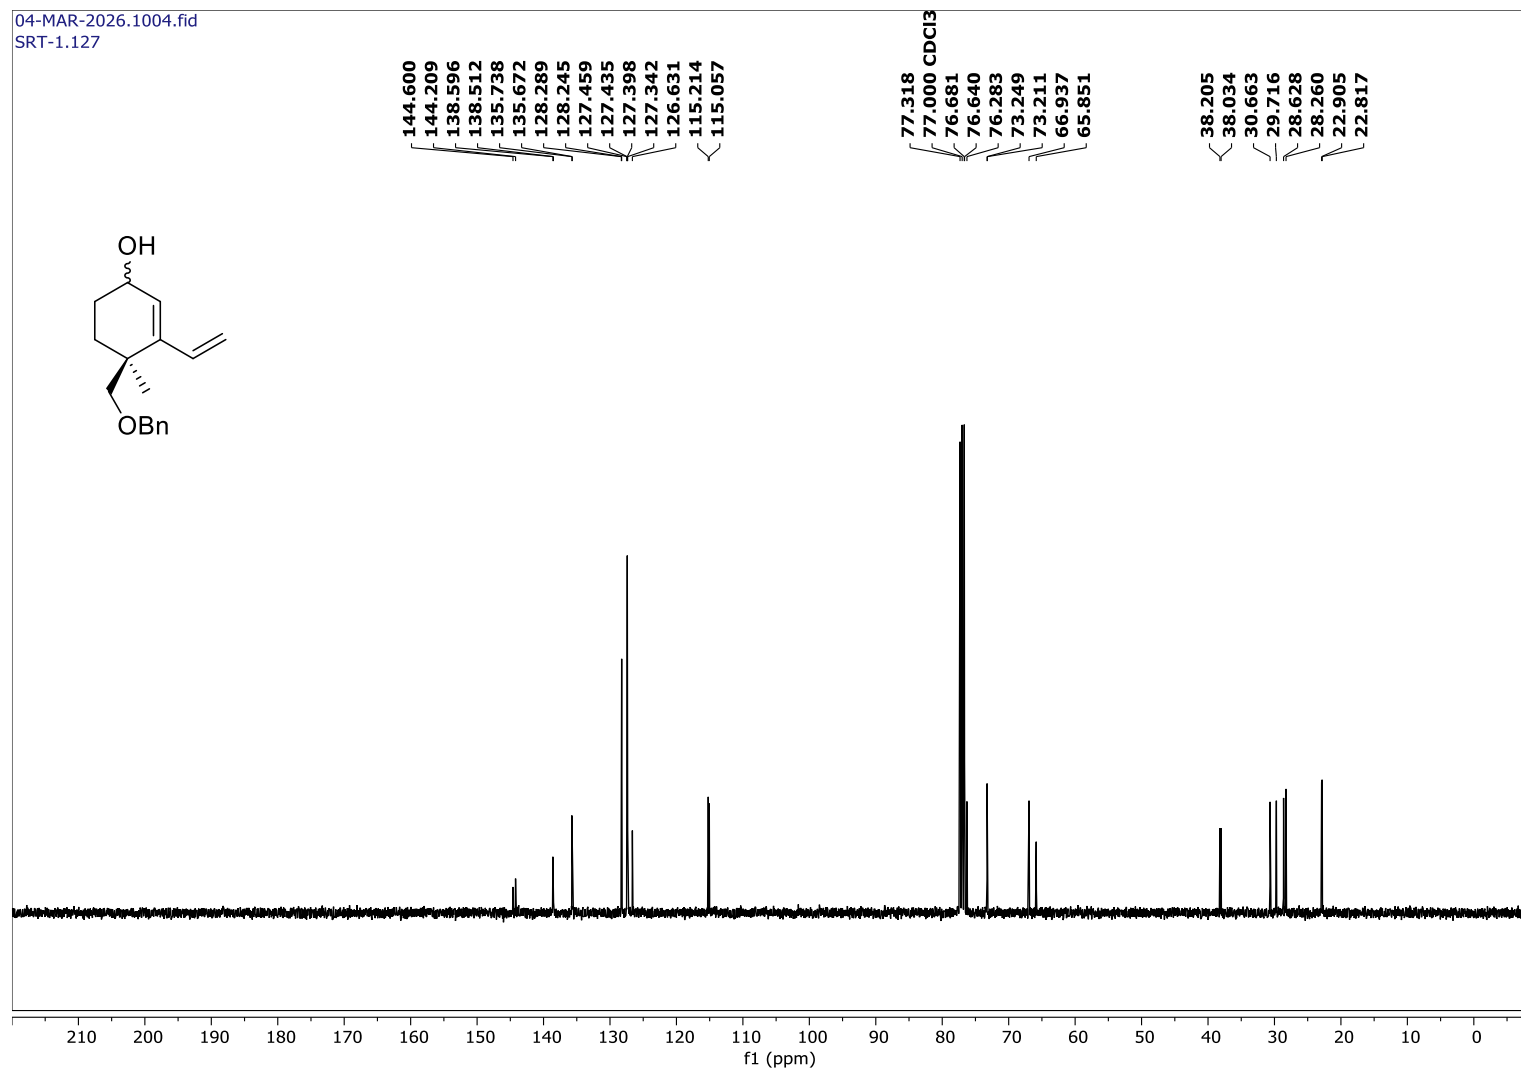

<sup>13</sup>C NMR spectrum (100 MHz, CDCl<sub>3</sub>) of **15**

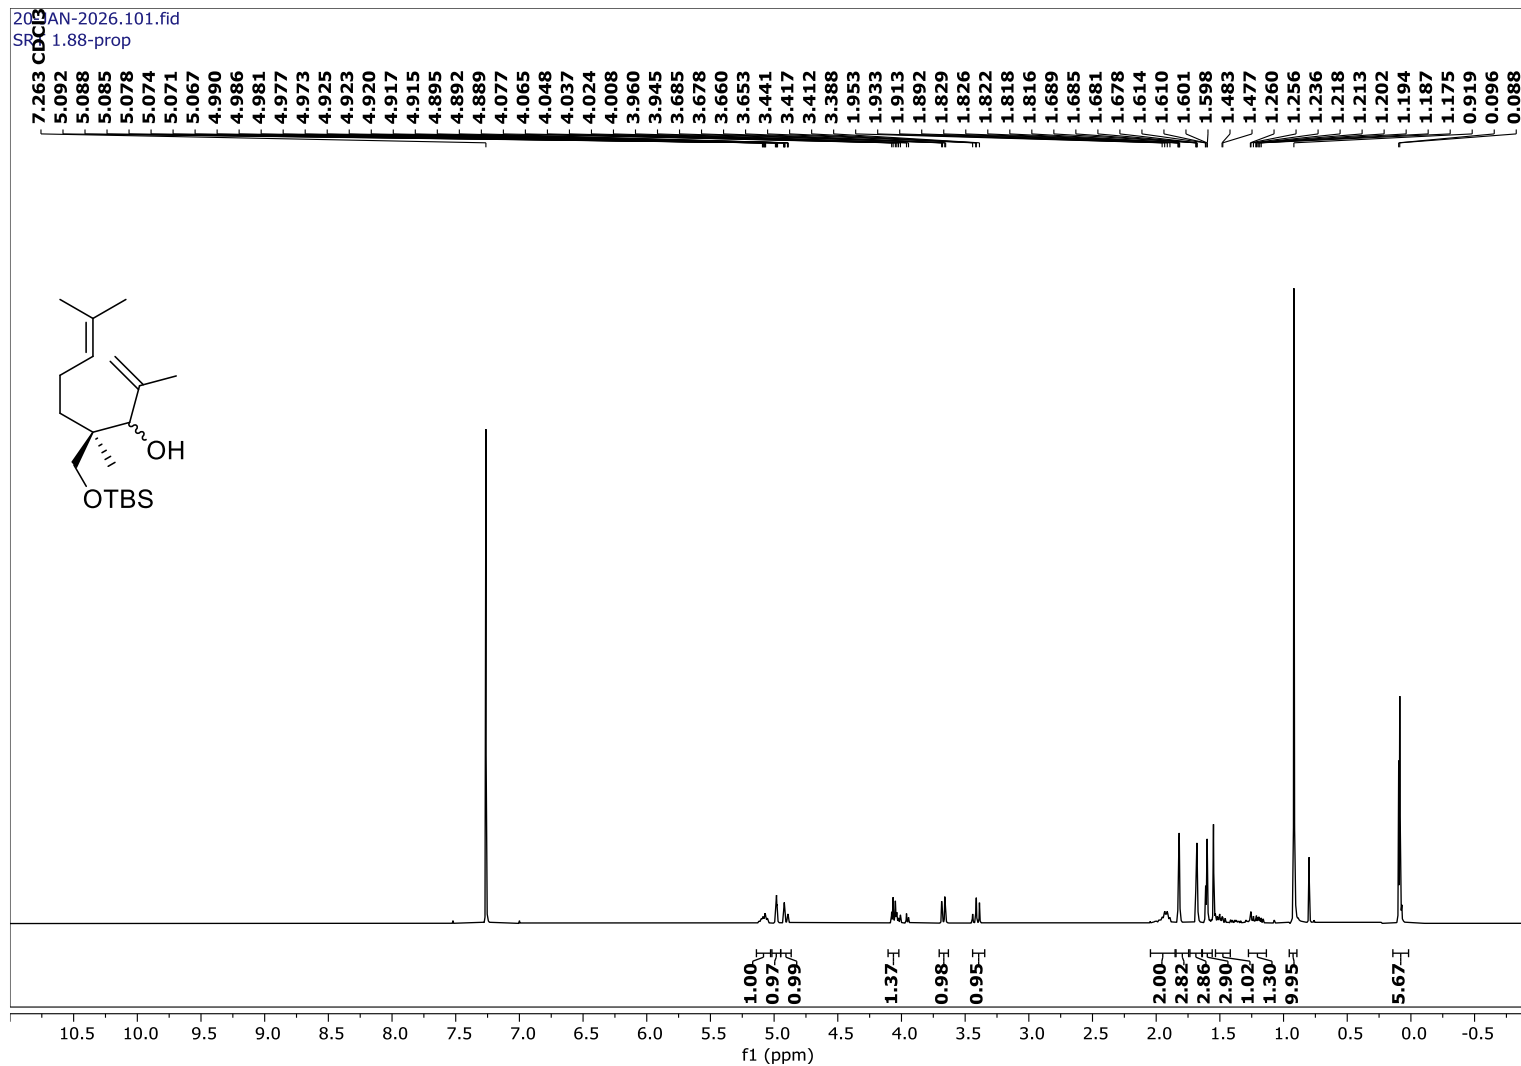

<sup>1</sup>H NMR spectrum (400 MHz, CDCl<sub>3</sub>) of **20**

30-JAN-2026.104.fid  
SRT 1.100

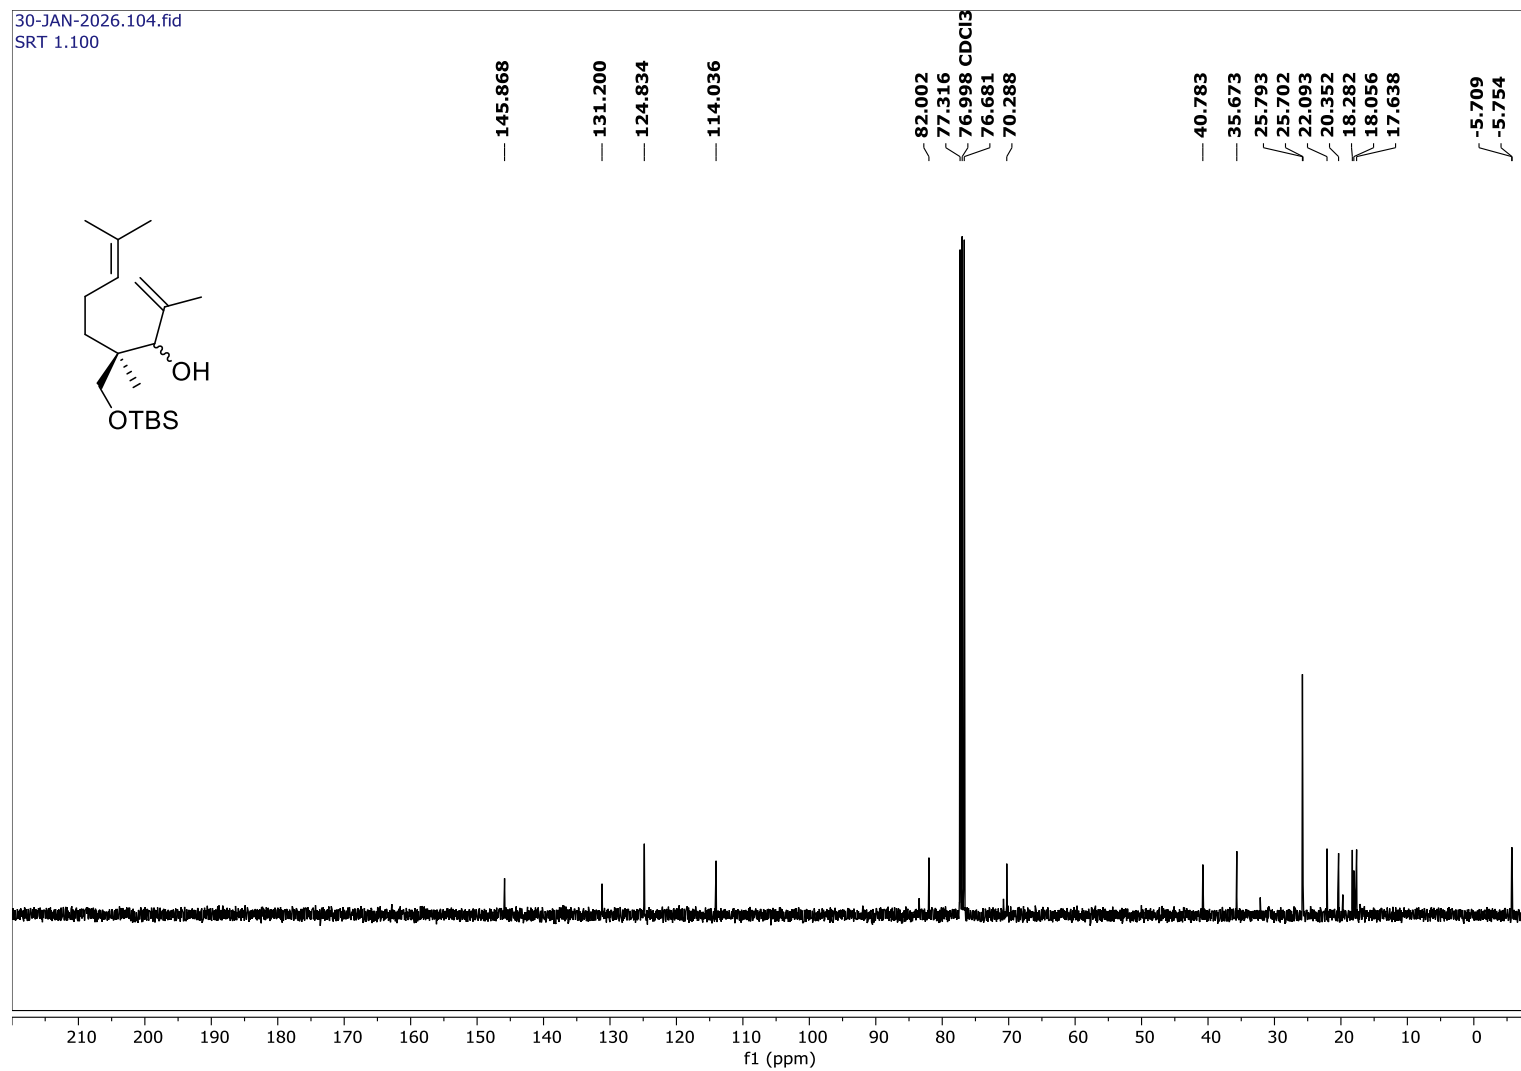

<sup>13</sup>C NMR spectrum (100 MHz, CDCl<sub>3</sub>) of **20**

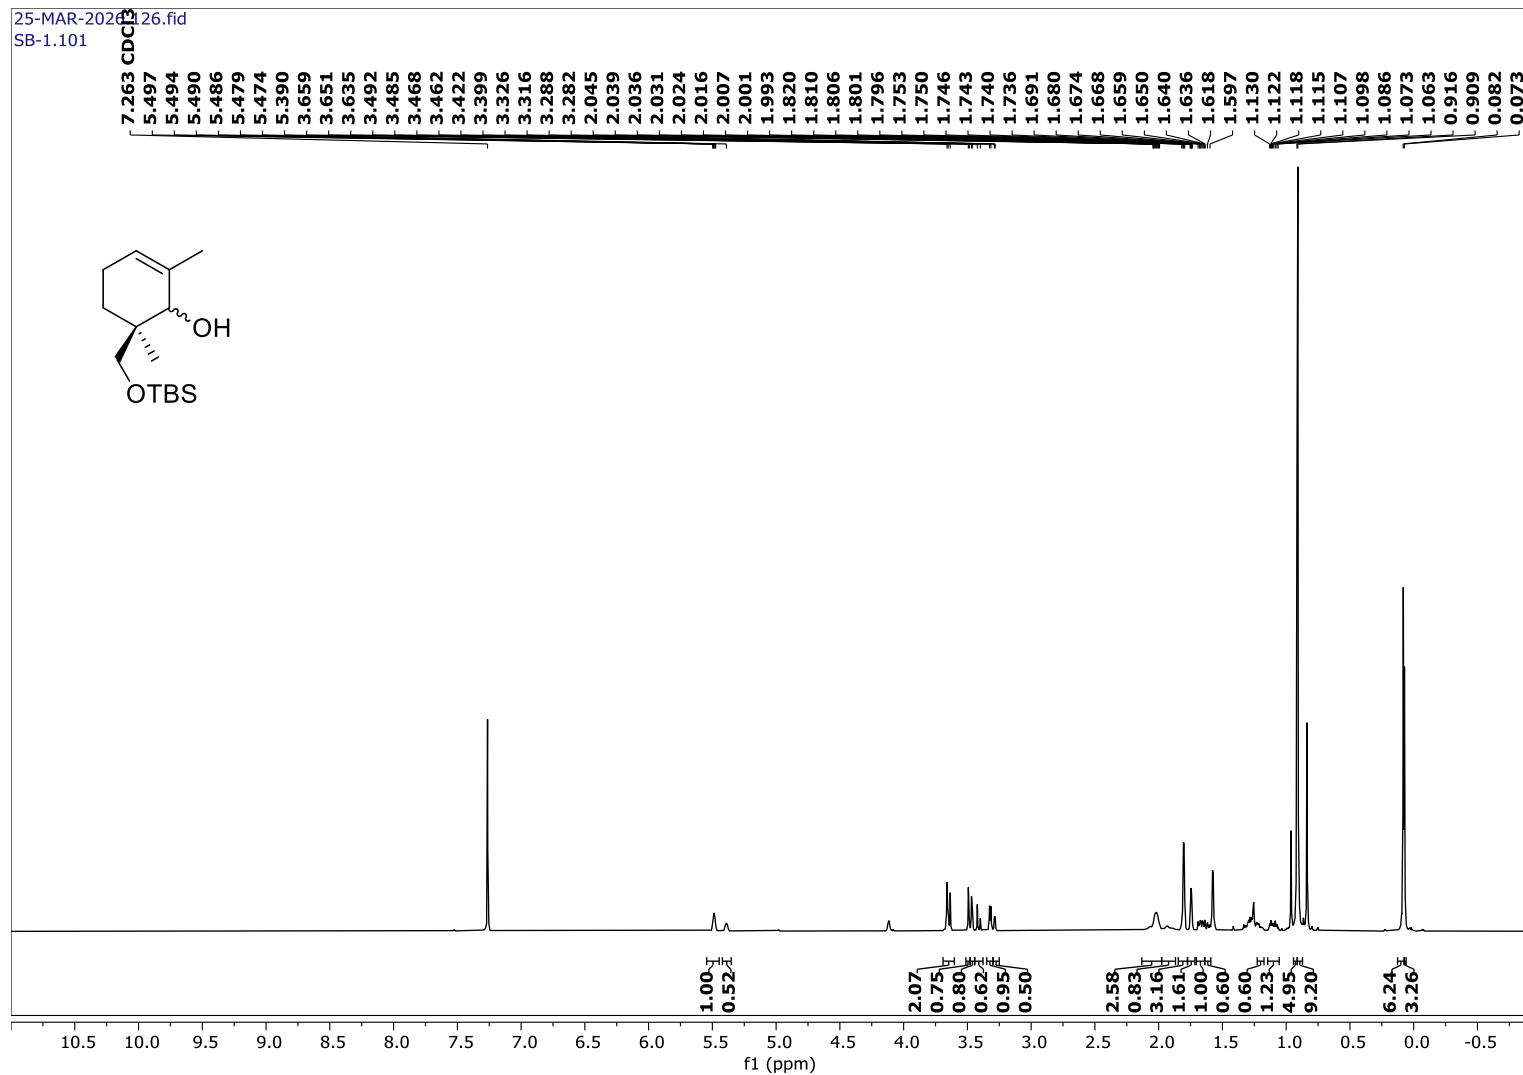

<sup>1</sup>H NMR spectrum (400 MHz, CDCl<sub>3</sub>) of **S2**

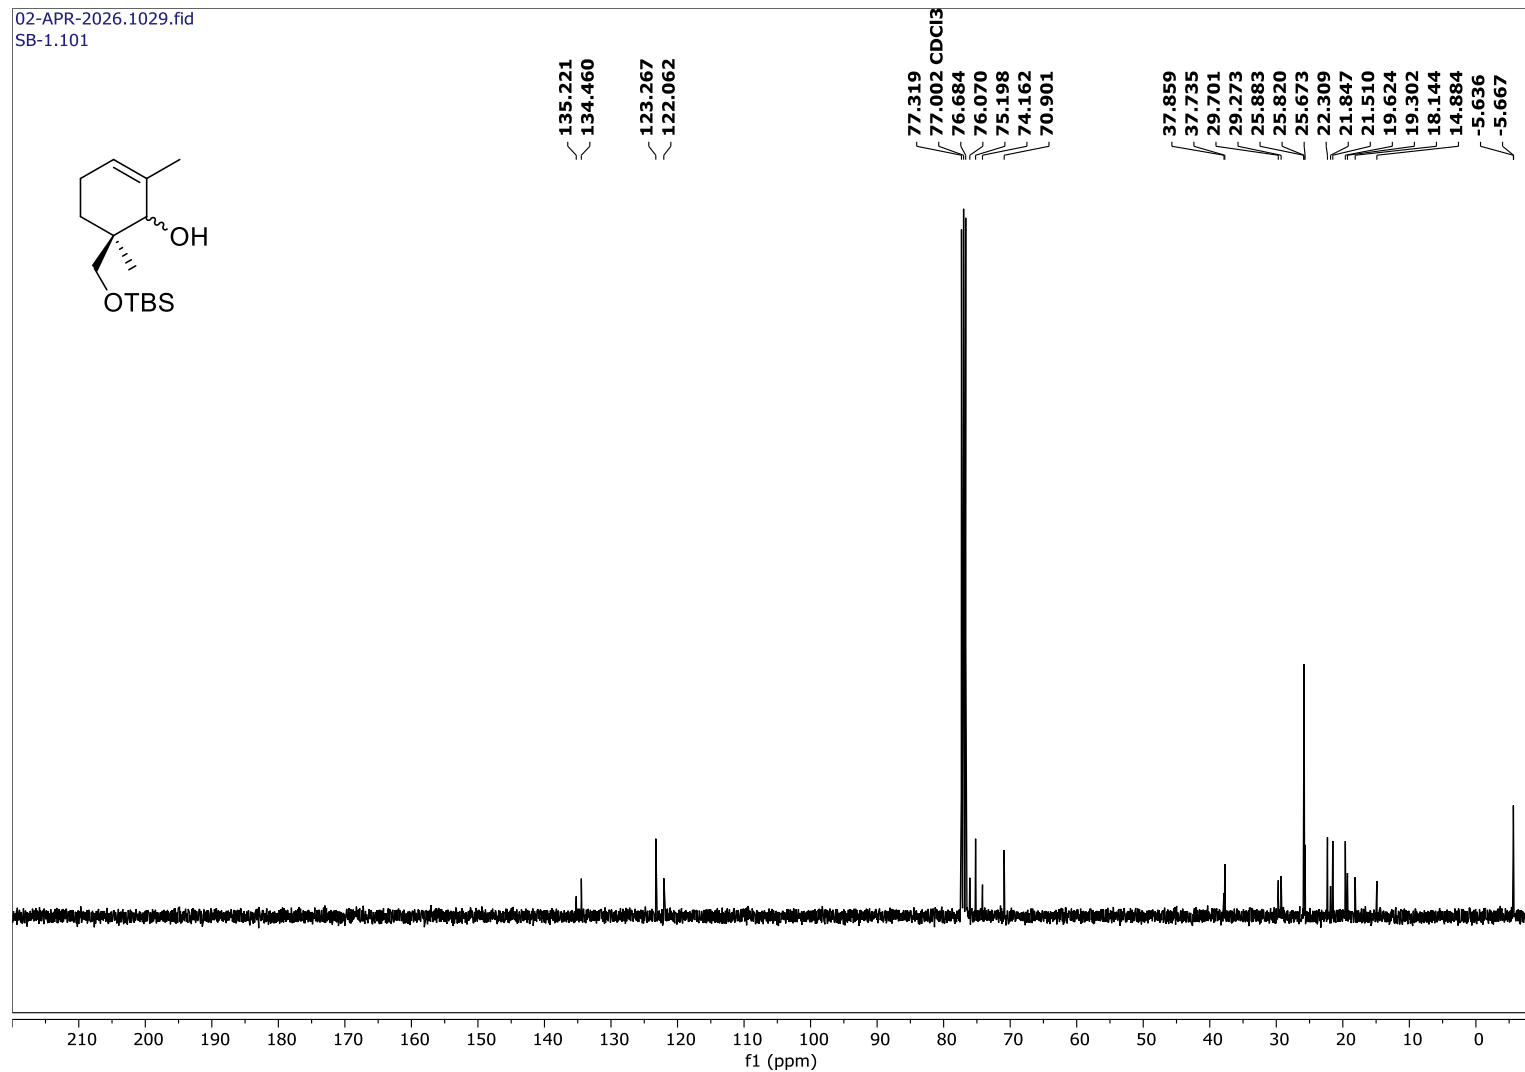

<sup>13</sup>C NMR spectrum (100 MHz, CDCl<sub>3</sub>) of S2

26-FEB-2026.103.fid  
SB-1.125

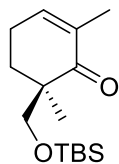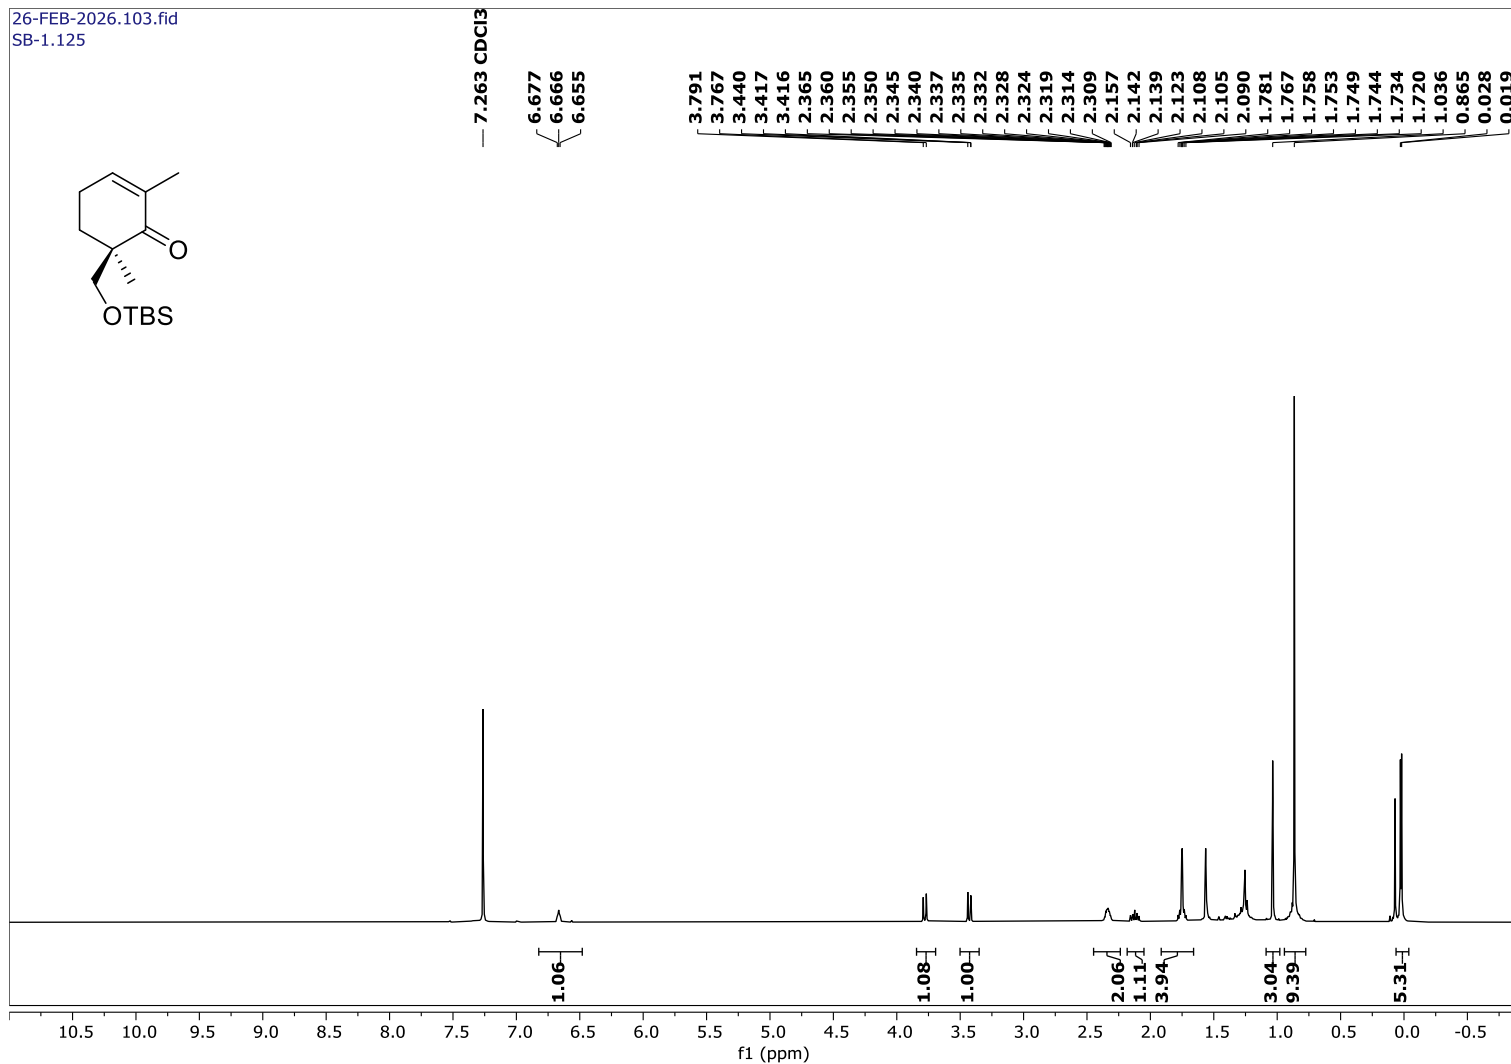

<sup>1</sup>H NMR spectrum (400 MHz, CDCl<sub>3</sub>) of **21**

24-JAN-2026.1027.fid  
SRT-1.96

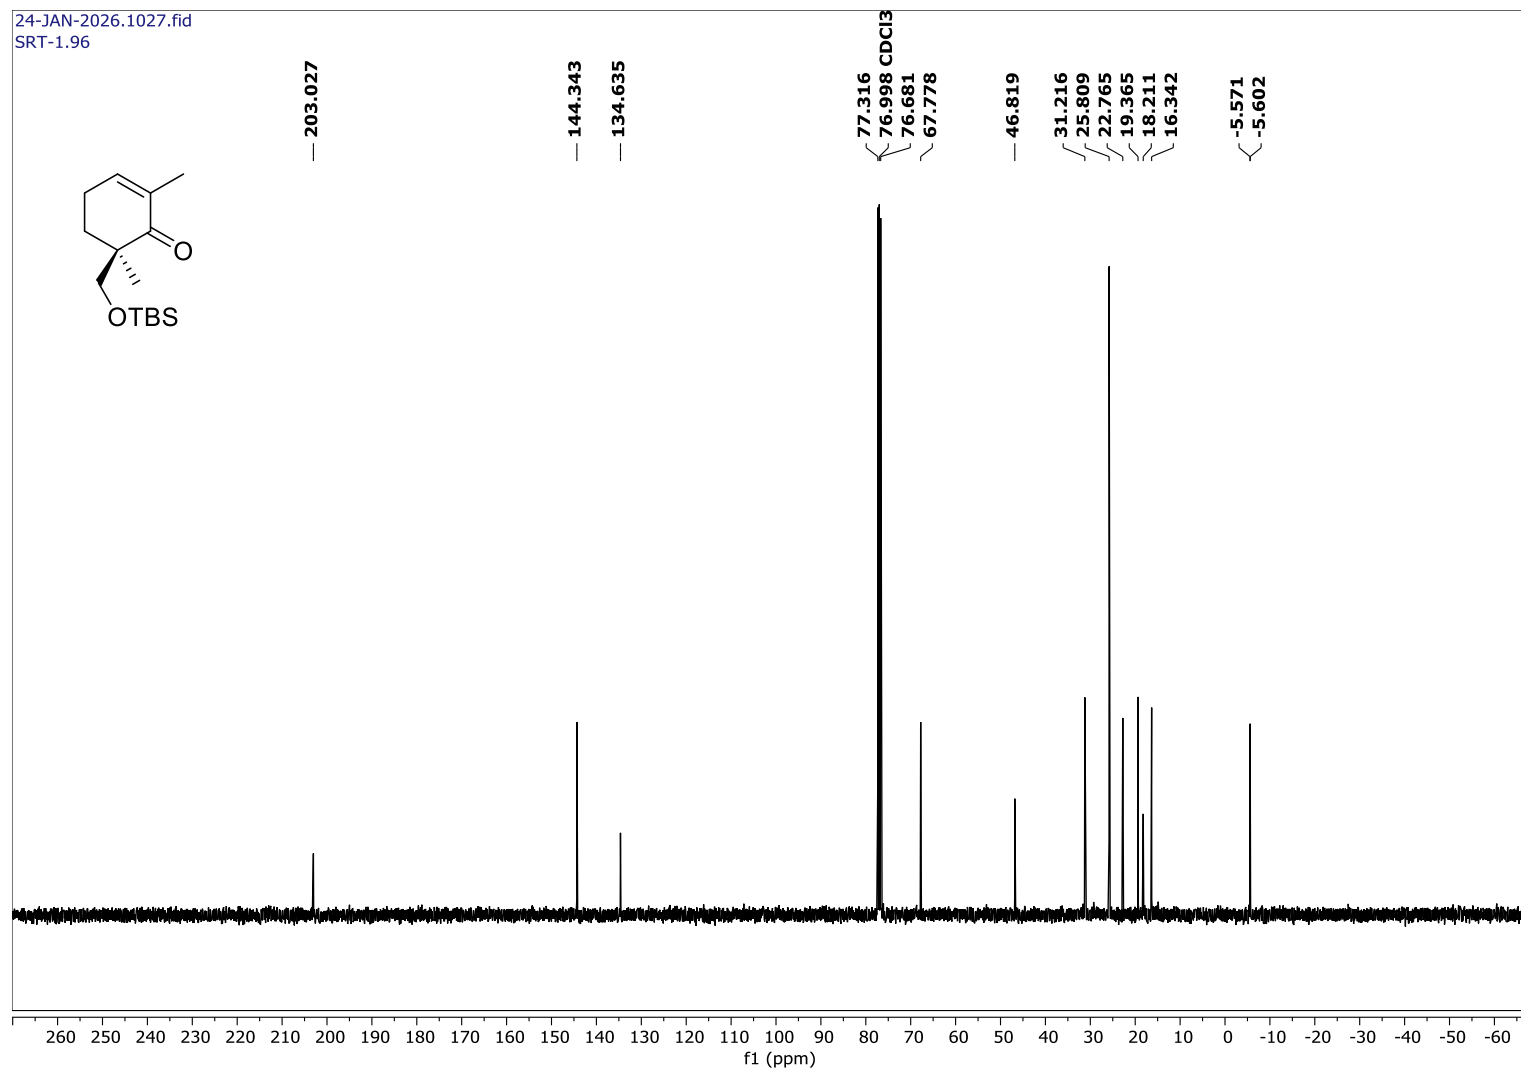

$^{13}\text{C}$  NMR spectrum (100 MHz,  $\text{CDCl}_3$ ) of **21**

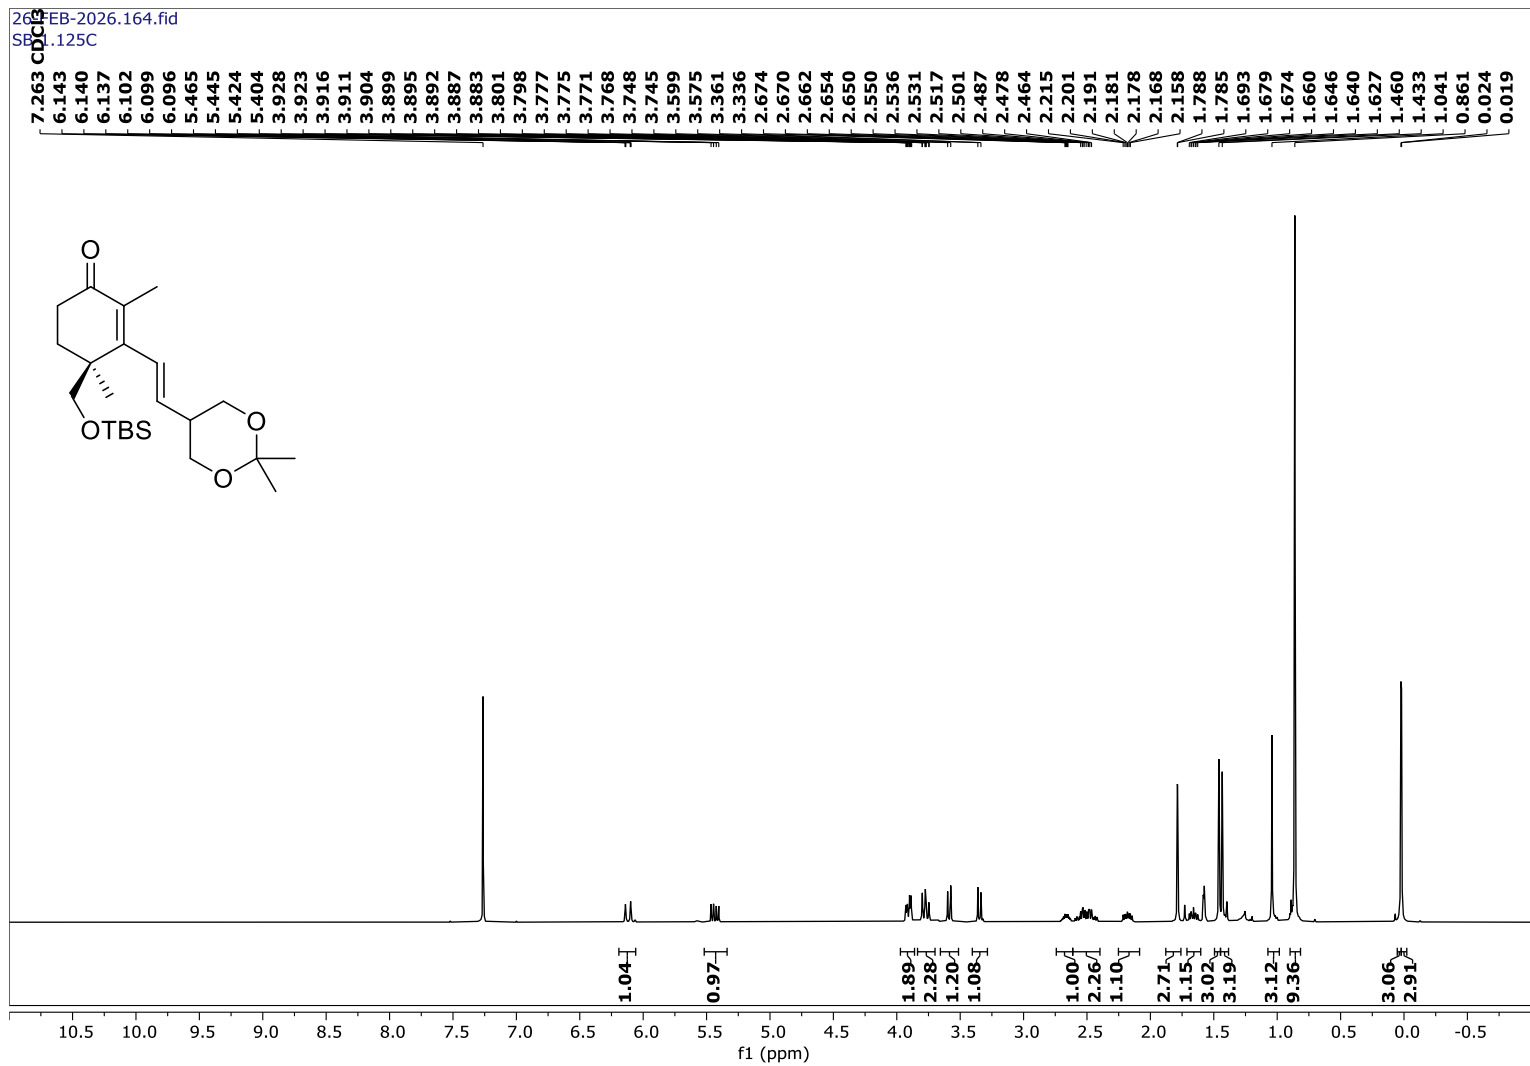

<sup>1</sup>H NMR spectrum (400 MHz, CDCl<sub>3</sub>) of **22**

27-FEB-2026.1012.fid  
SB.1.125 C

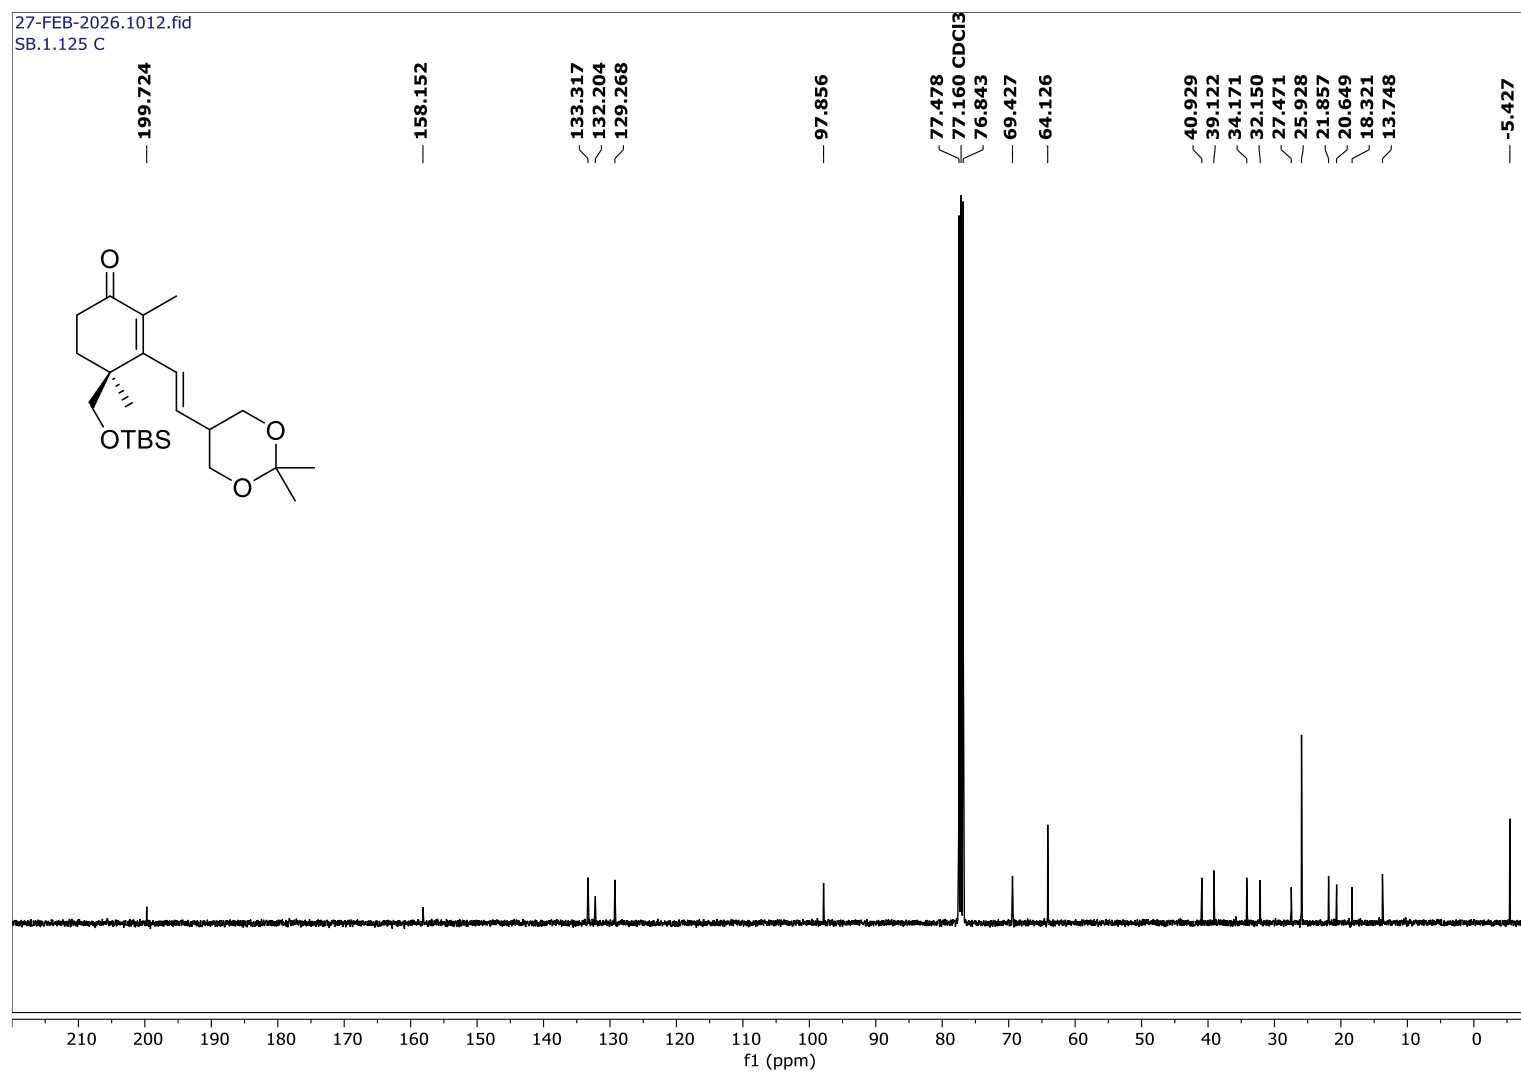

<sup>13</sup>C NMR spectrum (100 MHz, CDCl<sub>3</sub>) of **22**

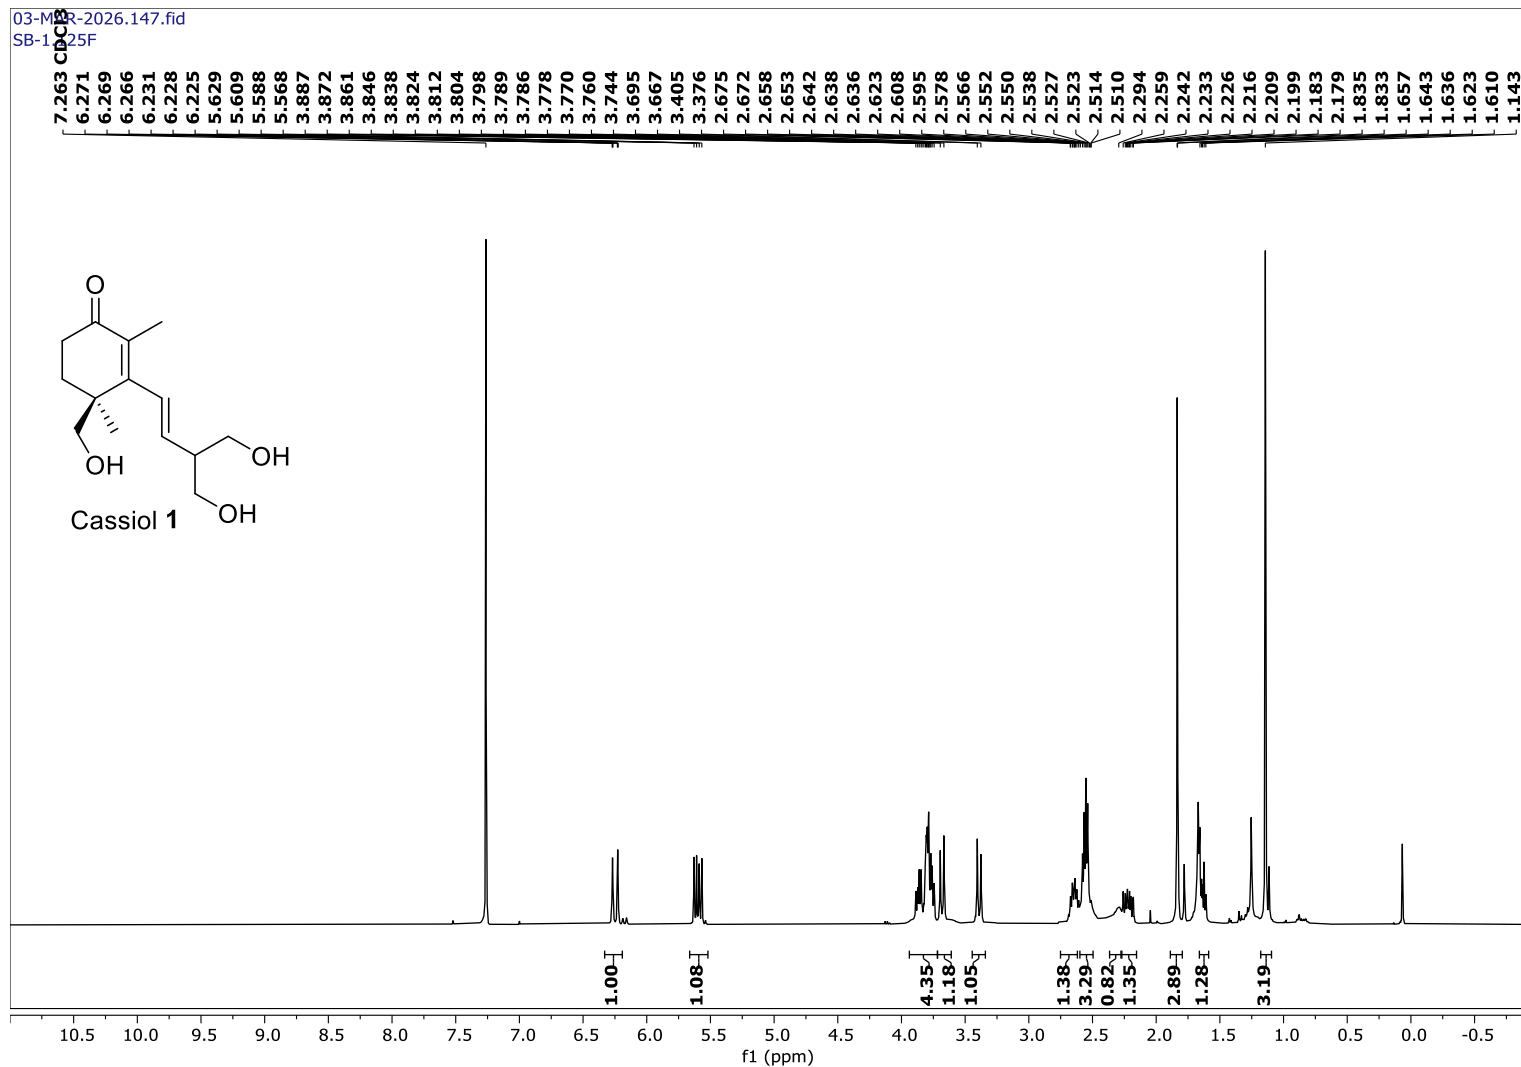

<sup>1</sup>H NMR spectrum (400 MHz, CDCl<sub>3</sub>) of **1**

04-MAR-2026.1007.fid  
SB-1.125F

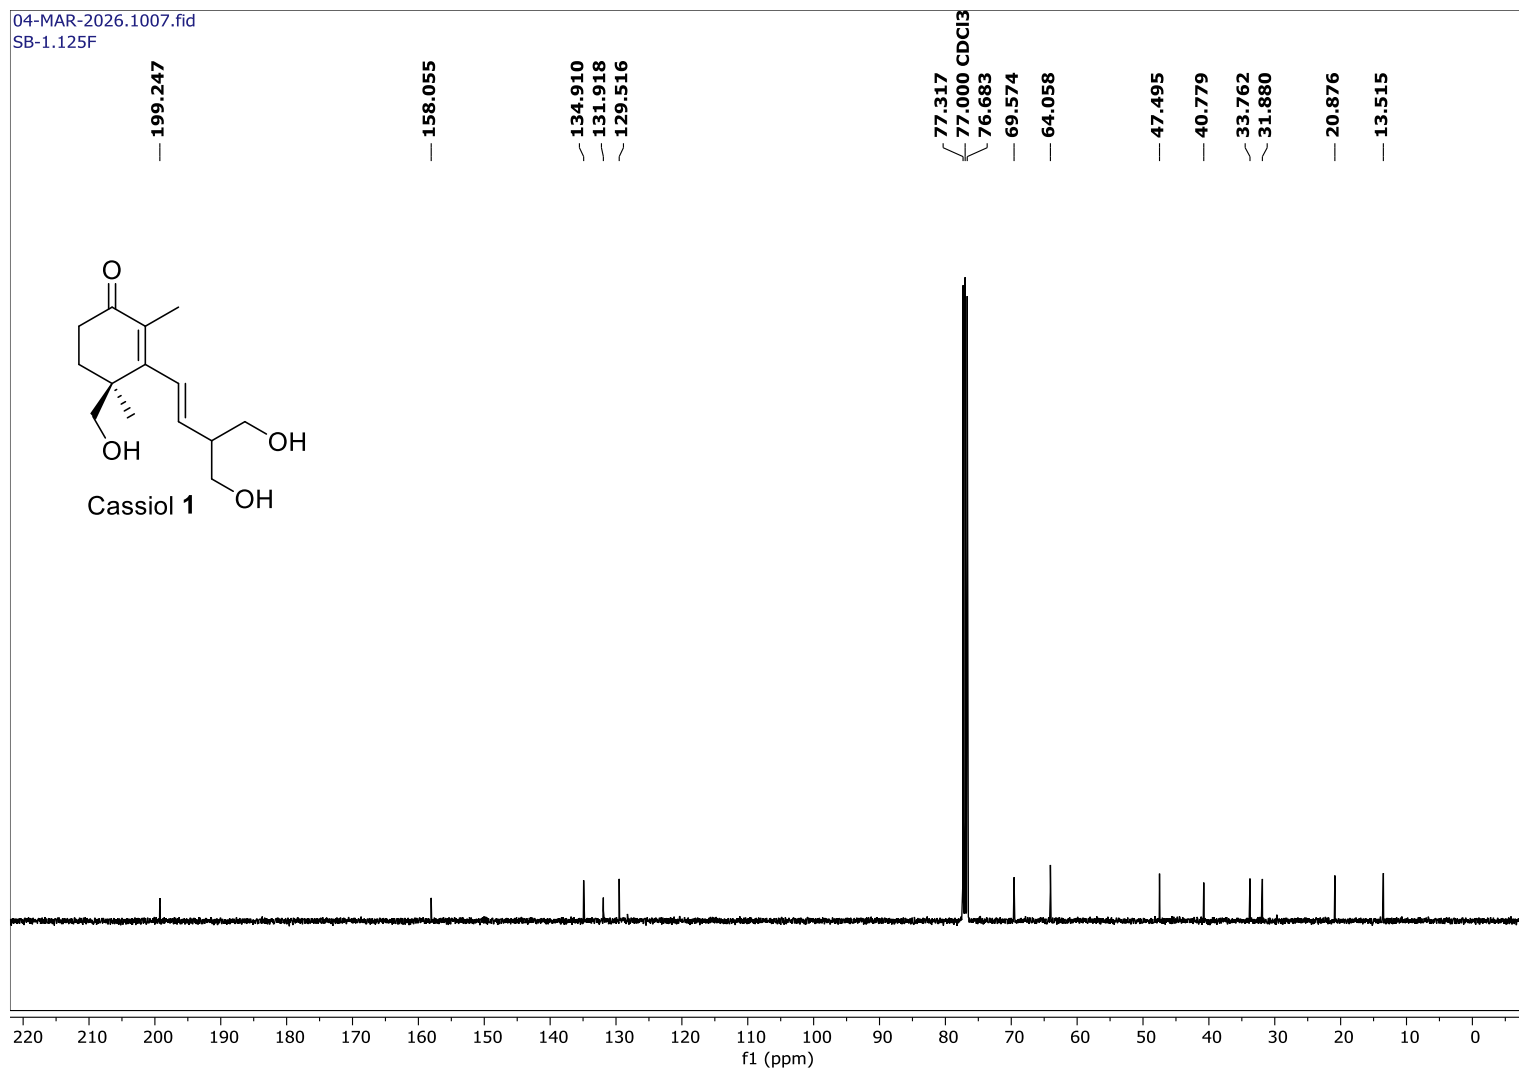

<sup>13</sup>C NMR spectrum (100 MHz, CDCl<sub>3</sub>) of **1**

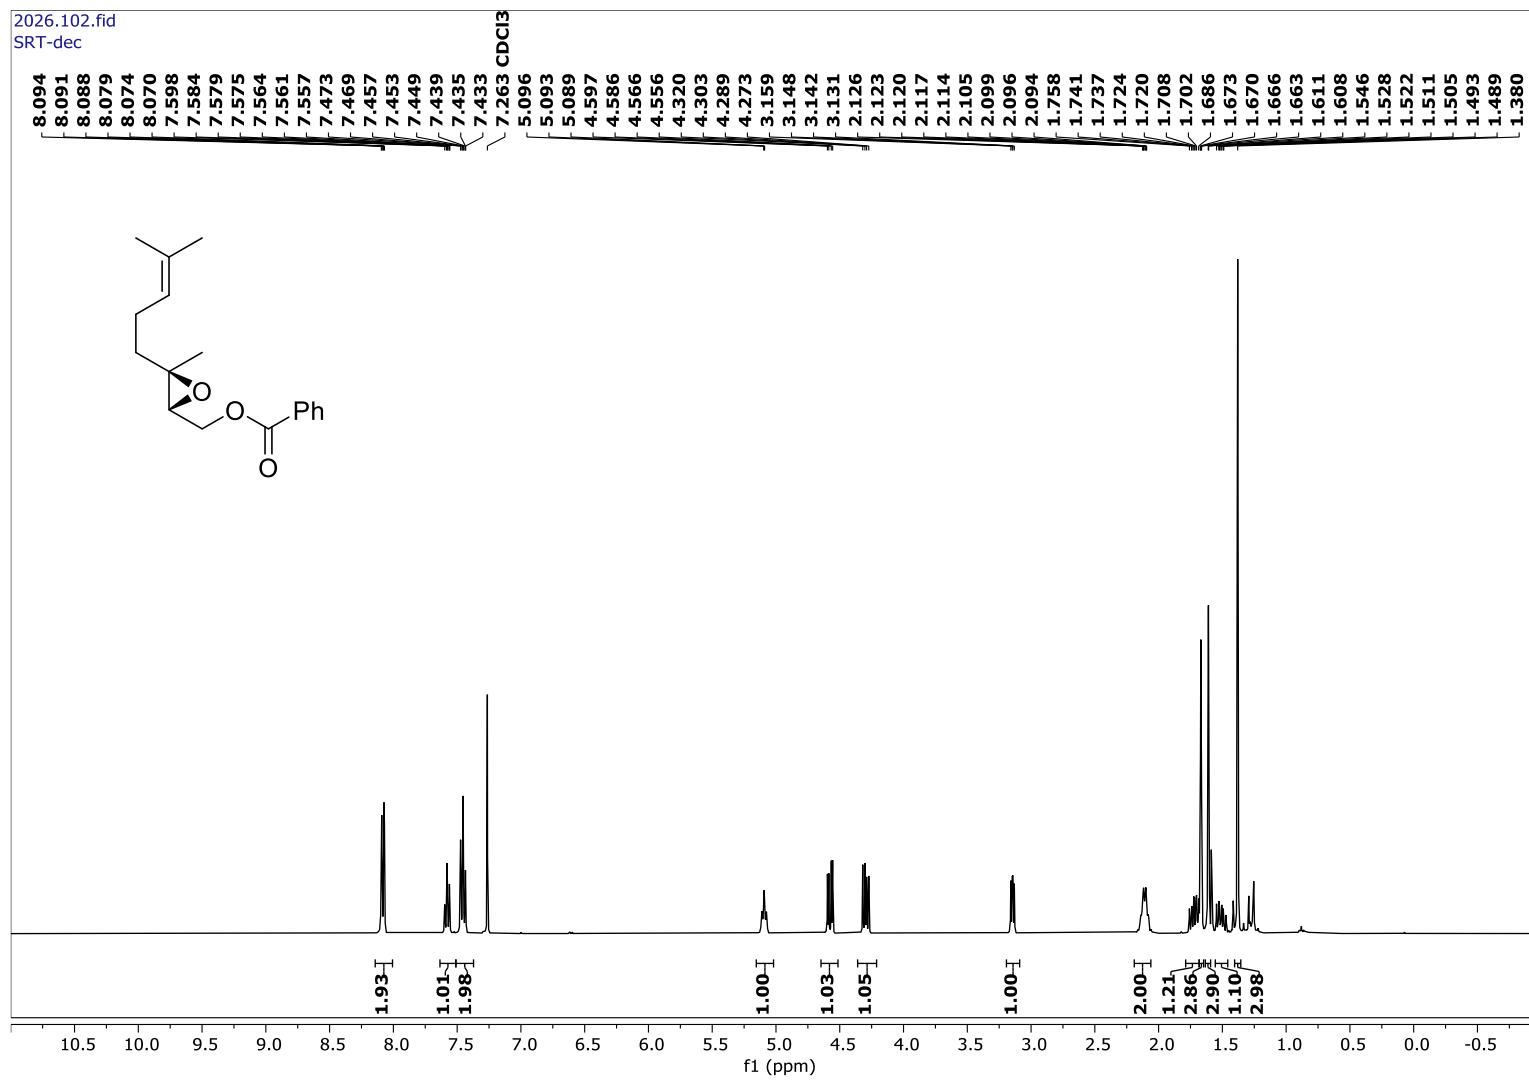

<sup>1</sup>H NMR spectrum (400 MHz, CDCl<sub>3</sub>) of **S3**

### HPLC analysis of racemic S3

|                      |                |                  |
|----------------------|----------------|------------------|
| Column               | Chiralpak OD-H |                  |
| Flow rate            | 0.7 mL/min     |                  |
| Injection volume     | 20 $\mu$ L     |                  |
| Detection wavelength | 254 nm         |                  |
| Mobile Phase         | A: Hexane      | B: <i>i</i> PrOH |
| Gradient             | A:B = 99:01    |                  |

| Peak# | Ret. Time | Area     | Height | Area%   | Height% |
|-------|-----------|----------|--------|---------|---------|
| 1     | 13.604    | 7376612  | 102964 | 49.641  | 61.877  |
| 2     | 26.437    | 7483238  | 63436  | 50.359  | 38.123  |
| Total |           | 14859850 | 166400 | 100.000 | 100.000 |

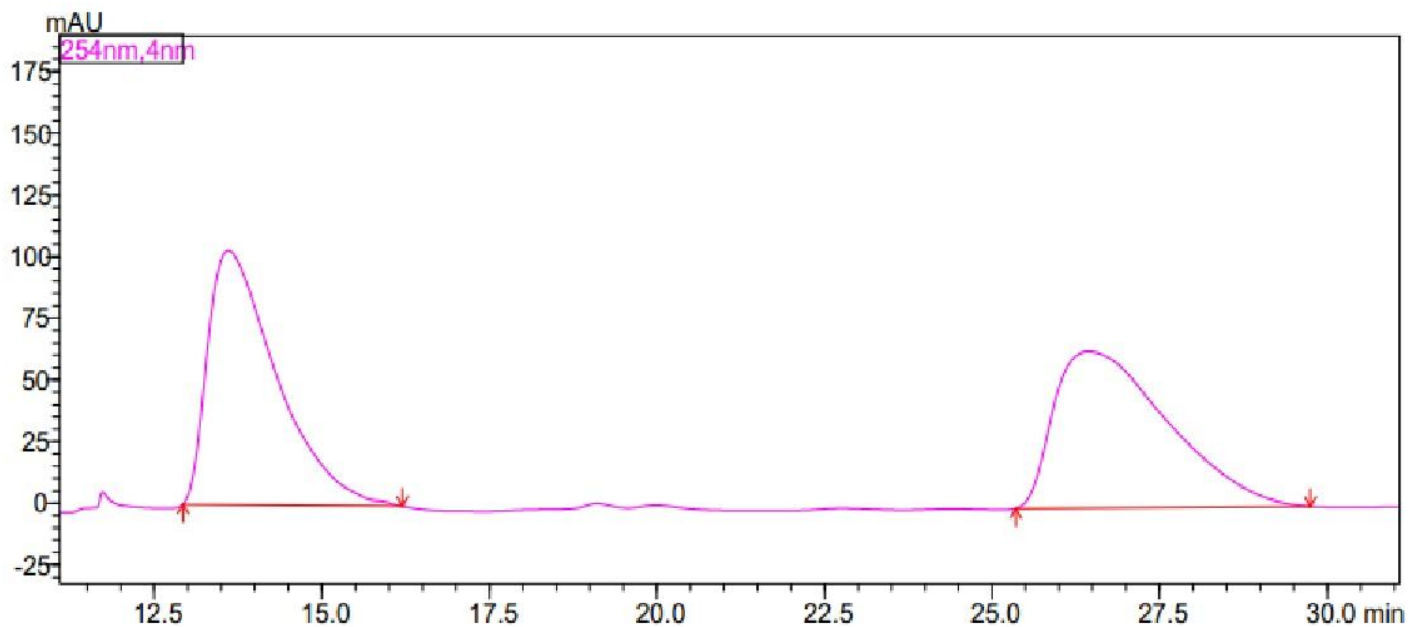

### HPLC analysis of S3

| Peak# | Ret. Time | Area     | Height | Area%   | Height% |
|-------|-----------|----------|--------|---------|---------|
| 1     | 13.348    | 36273319 | 547879 | 92.845  | 94.895  |
| 2     | 25.767    | 2795519  | 29476  | 7.155   | 5.105   |
| Total |           | 39068838 | 577355 | 100.000 | 100.000 |

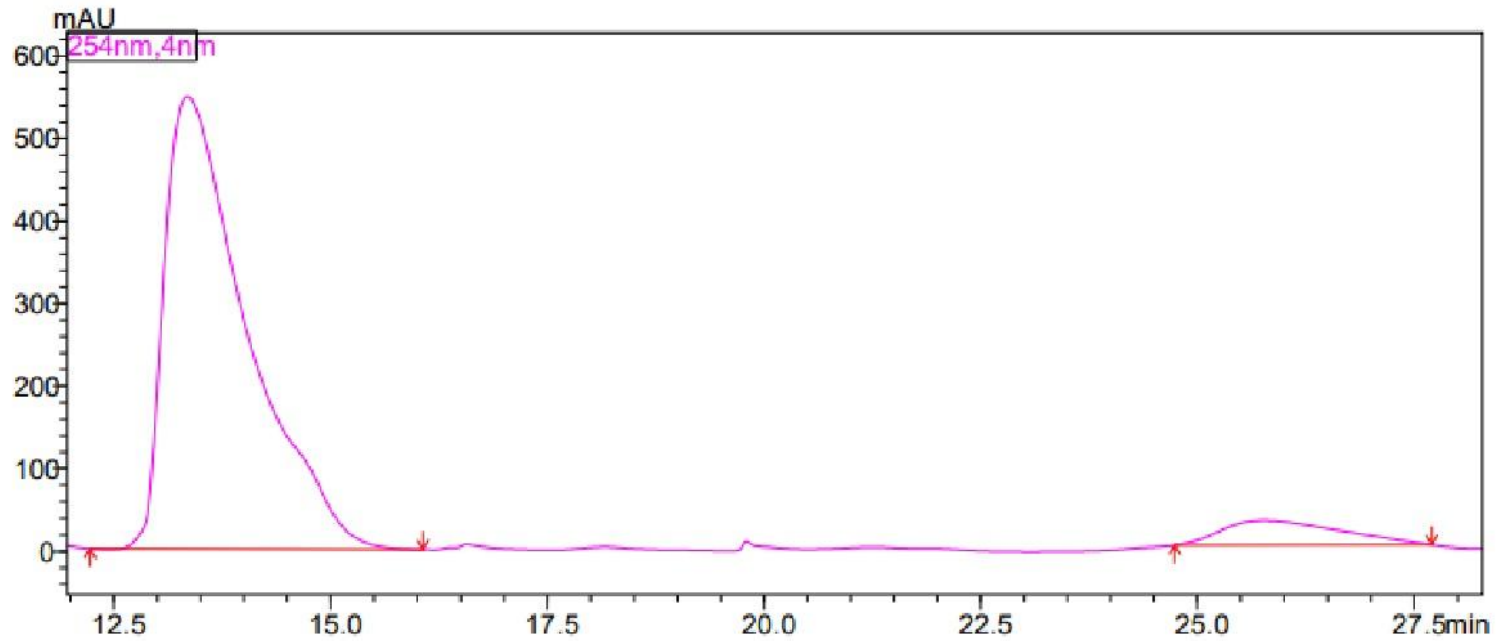

Supplement: d6ob00545d1.pdf [file d6ob00545d1.pdf]
